1 **Comparative genomics of beetle-vectored fungal pathogens reveals a reduction**  
2 **in genome size and independent evolution of pathogenicity of two tree**  
3 **pathogens.**

4 Taruna A Schuelke<sup>1</sup>, Anthony Westbrook<sup>2</sup>, Keith Woeste<sup>3</sup>, David C. Plachetzki<sup>1</sup>, Kirk Broders<sup>4</sup>,  
5 Matthew D. MacManes<sup>1</sup>

6  
7 <sup>1</sup>Department of Molecular, Cellular, & Biomedical Sciences, University of New Hampshire, 105  
8 Main Street, Durham, NH 03824; <sup>2</sup>Department of Computer Science, University of New  
9 Hampshire, 105 Main Street, Durham, NH 03824; <sup>3</sup>USDA Forest Service Hardwood Tree  
10 Improvement and Regeneration Center, Department of Forestry and Natural Resources, Purdue  
11 University, West Lafayette, IN 47907; <sup>4</sup>Department of Bioagricultural Sciences and Pest  
12 Management, Colorado State University, Fort Collins, CO 80523

13  
14 **Authors for correspondence**

15 Kirk Broders

16 Tel: +1 970 491 0850

17 Email: [kirk.broders@colostate.edu](mailto:kirk.broders@colostate.edu)

|                                                              |      |                                    |                             |
|--------------------------------------------------------------|------|------------------------------------|-----------------------------|
| Total word count (excluding summary, references and legends) | 5043 | No. of figures                     | 3 (all in color)            |
| Summary                                                      | 200  | No. of tables                      | 6                           |
| Introduction                                                 | 341  | No of supporting information files | 4 (Methods S1, Table S1-S4) |
| Materials and Methods                                        | 1511 |                                    |                             |
| Results                                                      | 2402 |                                    |                             |
| Discussion                                                   | 677  |                                    |                             |
| Acknowledgements                                             | 112  |                                    |                             |

18

## 19 **Summary**

- 20 • *Geosmithia morbida* is an emerging fungal pathogen which serves as a paradigm for  
21 examining the evolutionary processes behind pathogenicity because it is one of two  
22 known pathogens within a genus of mostly saprophytic, beetle-associated, fungi. This  
23 pathogen causes thousand cankers disease in black walnut trees and is vectored into  
24 the host via the walnut twig beetle. *G. morbida* was first detected in western US and  
25 currently threatens the timber industry concentrated in eastern US.
- 26 • We sequenced the genomes of *G. morbida* and two non-pathogenic *Geosmithia* species  
27 and compared these species to other fungal pathogens and nonpathogens to identify  
28 genes under positive selection in *G. morbida* that may be associated with pathogenicity.
- 29 • *G. morbida* possesses one of the smallest genomes among the fungal species observed  
30 in this study, and one of the smallest fungal pathogen genomes to date. The enzymatic  
31 profile of this pathogen is very similar to its relatives.
- 32 • Our findings indicate that genome reduction is an important adaptation during the  
33 evolution of a specialized lifestyle in fungal species that occupy a specific niche, such as  
34 beetle vectored tree pathogens. We also present potential genes under selection in *G.*  
35 *morbida* that could be important for adaptation to a pathogenic lifestyle.

## 36 **Key words**

37 *Geosmithia morbida*, pathogenicity, genome reduction, tree pathogen, thousand cankers  
38 disease.

39

40

41

42

43

## 44 Introduction

45 Uncovering the specific genetic and molecular events behind the evolution of novel traits such  
46 as pathogenicity in fungal species has been a long-standing objective of pathologists.  
47 *Geosmithia* (Ascomycota: Hypocreales), a genus first proposed in 1979 for fungi that were  
48 formerly placed in genus *Penicillium* (Pitt, 1979), serves a paradigm for examining the  
49 processes contributing to the evolution of pathogenicity. *Geosmithia* species are filamentous  
50 fungi that most commonly associate with phloeophagous bark beetles (Kolarik *et al.*, 2005;  
51 Kolarik *et al.*, 2011), although some *Geosmithia* fungi, such as *G. eupagioceri* and *G.*  
52 *microcorthyli*, are known to affiliate with ambrosia beetles (Kolarik & Jankowiak 2013).  
53 *Geosmithia* species and their beetle associates occupy a variety of hosts, including pines, oaks,  
54 junipers, and walnut trees (Kolarik *et al.*, 2007; Kolarik & Kirkendall 2010; Kolarik & Jankowiak  
55 2013). The ecology and diversity of symbiosis between these fungi and their beetle associates  
56 is poorly understood, but investigators are beginning to explore such relationships (Kolarik *et al.*,  
57 2007; Kolarik & Jankowiak 2013). While most species in *Geosmithia* are saprotrophic, two  
58 species were recently determined to be pathogenic—*G. pallida* (Lynch *et al.*, 2014) and *G.*  
59 *morbida* (Tisserat *et al.*, 2009), on coast live oak (*Quercus agrifolia*) and black walnut (*Juglans*  
60 *nigra*), respectively. However, both of these species live saprophytically in association with bark  
61 beetles and other tree hosts. It is still unclear what mechanisms allow these species of  
62 *Geosmithia* to be pathogenic to a new host while other members of the genus remain saprobes.  
63 *Geosmithia morbida* causes thousand cankers disease (TCD) in *Juglans nigra* (eastern  
64 black walnut). Although no evidence of TCD has been detected in other *Juglans* to date, several  
65 species, such as *J. californica*, *J. cinerea*, *J. hindsii*, *J. regia*, are also susceptible to the  
66 pathogen (Utleay *et al.*, 2013). The fungus is most often vectored into its hosts by *Pityophthorus*  
67 *juglandis*, commonly known as the walnut twig beetle (WTB) (Kolarik *et al.*, 2011). Unusual  
68 mortality of *J. nigra* was first noted in Colorado, US in 2001. Since then, nine western states  
69 (CO, WA, OR, ID, NV, UT, CA, NM, AZ) and seven eastern states (PA, OH, IN, MD, VA, TN,

70 NC) have reported TCD in one or more locations (Zerillo *et al.*, 2014). This increase in TCD is  
71 likely a consequence of the expansion of WTB's geographic range. WTB was present in only  
72 four counties of California, Arizona and New Mexico in the 1960s, however, as of 2014, the  
73 beetle has been detected in over 115 counties in the western and eastern US (Rugman-Jones  
74 *et al.*, 2014).

75 The origin of this pathogen is not clear. However, it has been hypothesized that *G.*  
76 *morbida* may have undergone a host shift from *J. major* (Arizona black walnut) to a more naïve  
77 host, *J. nigra*, because the fungus does not cause disease in the Arizona black walnut, and  
78 neither WTB nor *G. morbida* were observed in the native range of *J. nigra* until 2010 (Zerillo *et*  
79 *al.*, 2014). *J. nigra* is not indigenous to western US but was planted throughout the region as an  
80 ornamental species. An alternative prediction based on *G. morbida* population genetic data is  
81 that the origin of *G. morbida* and WTB are the walnut populations of southern California, where  
82 the pathogen has been isolated from both healthy and diseased *J. californica* trees (Zerillo *et*  
83 *al.*, 2014).

84 Early symptoms of infection by *G. morbida* include yellowing, wilting and thinning of the  
85 foliage followed by branch dieback and tree death within 2-3 years after the initial infestation  
86 (Tisserat *et al.*, 2009; Kolarik *et al.*, 2011). Little is known about the specific means *G. morbida*  
87 employs for initiating and maintaining the infection, or what benefits, if any, the fungus imparts  
88 to the WTB vector. However, previous studies have demonstrated that fungal pathogens that  
89 occupy ecological niches similar to *G. morbida* must be capable of enduring and combating  
90 toxic host environments used by plants to resist infection. For instance, *Grosmannia clavigera*, a  
91 fungal symbiont of the mountain pine beetle (*Dendroctonus ponderosae*), can detoxify  
92 metabolites such as terpenoids and phenolics produced by the host as defense mechanisms  
93 (DiGuistini *et al.*, 2011).

94 We recently developed a reference genome of *Geosmithia morbida* that consisted of 73  
95 scaffolds totaling 26.5 Mbp in length (Schuelke *et al.*, 2016). This genome represents one of the

96 smaller fungal tree pathogen genomes reported to date. Rapid changes in genome size have  
97 accompanied dramatic biological changes in newly emerged fungal and oomycete species  
98 (Raffaele & Kamoun 2012; Adhikari *et al.*, 2013). In fungi, a link has been observed between  
99 genome expansion and evolution of pathogenicity (Raffaele & Kamoun 2012). Genome  
100 expansions were associated with parasitism in general and increased pathogenicity and  
101 virulence in several fungal lineages (Spanu *et al.*, 2010). Previous genome sequencing of  
102 *Geosmithia morbida* (Schuelke *et al.*, 2016) showed that this newly emerged fungal pathogen  
103 has a smaller genome than several of its closely related nonpathogenic relatives in the  
104 Hypocreales. Hence, *Geosmithia* has taken an evolutionary path to pathogenicity that has not  
105 been characterized previously in plant-associated fungi.

106         The evolution of pathogenicity via genome size reduction is not understood, and  
107 although it is contrary to our current expectation of how pathogenicity develops in non-  
108 pathogens, it might be common, particularly in beetle-associated symbionts. In fact, in the last  
109 decade several beetle-associated fungi have emerged as plant pathogens, including  
110 *Grosmannia clavigera*, which is also a tree infecting, beetle-vectored fungus, and its genome  
111 size is only 29.8 Mb (Diguistini *et al.*, 2011). The arrival of new pathogens, frequently referred to  
112 as Black Swan events due to their perceived unpredictability, represent a significant threat to  
113 native and agriculturally important tree species (Pleotz *et al.*, 2013). Thus, beetle-associated  
114 symbionts that have switched to pathogens represent excellent models for investigating the  
115 evolution of pathogenicity and its relationship to genome size. Although the genus *Geosmithia* is  
116 distributed worldwide, *G. morbida*, and more recently, *G. pallida*, are the first members of the  
117 genus to be described as plant pathogens among the 60 known nonpathogenic species (Kolarik  
118 & Kirkendall 2010; Kolarik *et al.*, 2011; Lynch *et al.*, 2014).

119         In this work, we compare the reference genome of the pathogenic and host specific  
120 species *G. morbida* with two closely related non-pathogenic generalist species, *G. flava* and *G.*  
121 *putterillii*. Based on this comparison, we identify genes under positive selection that may be

122 involved in the specialization of a pathogenic life strategy that depends on a single beetle vector  
123 and a narrow, but potentially expanding, host range. We also present a species phylogeny  
124 estimated using single-copy orthologs that confirms the placement of *Geosmithia* species in the  
125 order Hypocreales, and that their closest fungal relative is *Acremonium chrysogenum*. The  
126 primary goal of this study was to gain insight into the evolution of pathogenicity within *G.*  
127 *morbida*. We also investigated the presence of convergent evolution in *G. morbida* and  
128 *Grosmannia clavigera*, two tree pathogens vectored into their hosts via beetle symbionts.

## 129 **Materials and Methods**

### 130 **DNA extraction and sequencing**

131 The CTAB method delineated by the Joint Genome Institute was used to extract DNA for  
132 genome sequencing from lyophilized mycelium of *Geosmithia flava* and *Geosmithia putterillii*  
133 (Kohler *et al.*, 2011). Table 1 lists genetic, geographic, and host information for each *Geosmithia*  
134 species used in this study. Total DNA concentration was measured with Nanodrop, and DNA  
135 sequencing was conducted at Purdue University Genomics Core Facility in West Lafayette,  
136 Indiana. DNA libraries were prepared using the paired-end Illumina Truseq protocol and  
137 sequenced on an Illumina HiSeq 2500 using a single lane. Mean insert sizes for *G. flava* and *G.*  
138 *putterillii* were 477bp and 513bp, correspondingly. The remaining sequencing statistics can be  
139 found in Table 2.

### 140 **Preprocessing sequence data**

141 The raw paired-end reads for *G. flava* and *G. putterillii* were corrected using BFC (version r181)  
142 (Li 2015). BFC utilizes a combination of hash table and bloom-filter to count *k*-mers for a given  
143 read and correct errors in that read based on the *k*-mer support. Because BFC requires  
144 interleaved reads as input, khmer 1.1 was leveraged to interleave as well as split the paired-end  
145 reads before and after the error correction stage, respectively (Crusoe *et al.*, 2015). Next, low  
146 quality bases and adapters in error corrected reads were trimmed with Trimmomatic, version  
147 0.32, using a Phred threshold of 4 (Bolger *et al.*, 2014).

## 148 **Assembly construction**

149 Genome assemblies were constructed with ABySS 1.9.0 using four k-mer sizes (61, 71, 81, and  
150 91) (Simpson *et al.*, 2009). The resulting assemblies were evaluated using BUSCO (v1.1b1)  
151 (Simão *et al.*, 2015), which assess completeness based on the presence of universal single-  
152 copy orthologs within fungi. Length-based statistics were generated with QUASt v2.3 (Gurevich  
153 *et al.*, 2013). Final assemblies were manually chosen based on length-based and genome  
154 completeness statistics. Furthermore, the raw reads of *G. flava* and *G. putterillii* were mapped  
155 back to their corresponding genomes using BWA version 0.7.9a-r786 (Li & Durbin, 2009) to  
156 assess the quality of the chosen assemblies.

## 157 **Structural and Functional Annotation**

158 We utilized the automated annotation software Maker version 2.31.8 (Cantarel *et al.*, 2008) to  
159 functionally annotate the genomes of *G. flava* and *G. putterillii*. We used two of the three gene  
160 prediction tools available within the pipeline SNAP (released 2013, Korf 2004) and Augustus  
161 2.5.5 (Stanke *et al.*, 2006). SNAP was trained using gff files generated by CEGMA v2.5 (a  
162 program similar to BUSCO) (Parra *et al.*, 2007). Augustus was trained with *Fusarium solani*  
163 protein models (v2.0.26) downloaded from Ensembl Fungi (Kersey *et al.*, 2016). The protein  
164 sequences generated by the structural annotation were blasted against the Swiss-Prot database  
165 (Boutet *et al.*, 2016) to functionally annotate the genomes of *G. flava* and *G. putterillii*.

## 166 **Assessing repetitive elements profile**

167 To evaluate the repetitive elements profile of *G. flava* and *G. putterillii*, we masked the  
168 interspersed repeats within the assembled genomes with RepeatMasker 4.0.5 (Smit *et al.*,  
169 1996) using the sensitive mode and default values as arguments.

## 170 **Identifying putative genes involved in host-pathogen interactions**

171 To search for putative genes contributing to pathogenicity, we conducted a BLASTp (v2.2.28+)  
172 (Altschul *et al.*, 1990) search with an e-value threshold of 1e-6 against the PHI-base 4.0  
173 database (Winnenburg *et al.*, 2006) that includes known genes implicated in pathogenicity.

174 Additionally, we identified proteins that contain signal peptides and lack transmembrane  
175 domains in each *Geosmithia* species as well as their close relative *Acremonium chrysogenum*  
176 with SignalP 4.1 and TMHMM 2.0 using default parameters (Krogh *et al.*, 2001; Peterson *et al.*,  
177 2011).

### 178 **Identifying species specific genes**

179 To identify unique genes present in *Geosmithia morbida*, we performed an all-versus-all  
180 BLASTp search among the three *Geosmithia* species and *A. chrysogenum* with Orthofinder  
181 version 0.3.0 (Emms & Kelly 2015). Using a [custom Python script](#), we analyzed homology  
182 among the four fungal species.

### 183 **Identifying carbohydrate-active proteins and peptidases**

184 To identify enzymes capable of degrading carbohydrate molecules in species belonging to  
185 Hypocreales and *G. clavigera*, we performed a HMMER 3.1b1 (Eddy 1998) search against the  
186 CAZy database (Lombard *et al.*, 2014) released July 2015 and filtered the results following the  
187 developer's recommendations. Lastly, we profiled the proteolytic enzymes present in species  
188 using the *MEROPS* database 10.0 (Rawlings *et al.*, 2016).

### 189 **Phylogenetic analysis**

#### 190 **Taxon Sampling**

191 In order to determine phylogenetic position of *Geosmithia*, we combined the predicted peptide  
192 sequences from three *Geosmithia* species described here with the predicted peptide sequences  
193 of an additional 17 fungal genomes that represent the breadth of pathogens and non-pathogens  
194 within Ascomycota. Our dataset contained eleven pathogens and nine non-pathogens (Table 3).

#### 195 **Inferring Orthology**

196 Orthologous peptide sequences among the 20 fungal genomes were determined using  
197 OrthoFinder version 0.3.0 (Emms & Kelly 2015). OrthoFinder performs an all-versus-all BLASTp  
198 (2.2.28+, Altschul *et al.*, 1990) search among a set of protein coding genes to infer orthogroups  
199 and aligns them using MAFFT (v7.123b, Katoh & Standley 2013). These orthogroups may



200 contain paralogs as well as orthologs, and because datasets rich in paralogs can confound  
201 phylogenomic analysis, the alignment files produced by OrthoFinder were parsed to recover  
202 only those orthogroups that contained single-copy orthologs from each of the 20 species. This  
203 resulted in 1,916 total orthogroups with 100% taxon occupancy.

#### 204 **Trimming Alignments**

205 For each alignment, regions that contained gap rich sites were removed using *-gappout* option  
206 in trimAl v1.4.rev15 (Capella-Gutiérrez *et al.*, 2009). Next, all files containing orthogroups were  
207 renamed so the respective headers among these files were identical and individual alignments  
208 were concatenated. Concatenation resulted in a single fasta file containing all 1,916 partitions  
209 with 1,054,662 sites at 100% taxon occupancy. This initial alignment was further filtered using  
210 MARE (v.0.1.2) (Misof *et al.*, 2013), which reduced the character matrix to 247,627 sites. This  
211 reduced fasta alignment was converted into a partitioned phylip formatted file. Next, the best-fit  
212 substitution models for each partition and a global partitioning scheme were determined with  
213 PartitionFinder (v1.1.1) using hcluster clustering algorithm and default parameters (Lanfear *et*  
214 *al.*, 2014).

#### 215 **Constructing Phylogeny**

216 Maximum likelihood (ML) analysis was conducted in RaxML v 8.1.20 (Stamatakis 2014)  
217 leveraging the partitioning scheme determined by PartitionFinder. The ML tree and 200  
218 bootstrap replicates were performed in a single analysis using the *-f a* option. In addition, we  
219 conducted Bayesian Markov Chain Monte Carlo (BMCMC) analysis in MrBayes 3.2.6 (Ronquist  
220 *et al.*, 2012). For MrBayes analysis, we specified the mixed amino acid model prior and ran the  
221 fully partitioned tree search for 215,000 generations. A consensus tree was then generated after  
222 discarding 50% of the run as burnin. The nexus file, including MrBayes block, provides other  
223 details of the MrBayes analysis (Methods S1).

#### 224 **Detecting genes under positive selection**

225 To identify genes under positive selection in *G. morbida*, we compared *G. morbida* with all non-  
226 pathogens from the aforementioned 20 fungi used to estimate the species tree. Among this  
227 batch of 10 fungal species, we detected 22,908 protein orthogroups using OrthoFinder that  
228 contained paralogs as well as orthologs. Of these, only 9,560 orthogroups were alignable with  
229 MAFFT because many groups consisted of only one sequence from a single species (Kato &  
230 Standley, 2013). A total of 3,327 orthogroups, composed of single-copy orthologs, were filtered  
231 and corresponding coding DNA sequences for each peptide in these partitions were extracted  
232 using custom scripts that can be found [online](#).

233 The coding DNA sequences were then aligned with MACSE v1.01.b (Ranwez *et al.*,  
234 2011). This Java-based utility accounts for frameshifts and premature stop codons in coding  
235 sequences during the alignment process and outputs aligned protein and nucleotide sequences.  
236 In order to filter out alignments with frameshifts and internal stop codons, we utilized a program  
237 called PAL2NAL v14 (Suyama *et al.*, 2006). This software searches for complementary regions  
238 between multiple protein alignments and the corresponding coding DNA sequences, and omits  
239 any problematic codons from the output file. This cleaning step reduced the number of 3,327  
240 orthogroups to 2,798 that were used for detecting genes under selective pressures.

241 We used the branch-site model (BSM) in the CodeML program of package PAML v4.8  
242 for selection analysis (Yang 2007). BSM permits  $\omega$  (dN/dS) to vary among sites and branches  
243 permitting the identification of specific branches and sites subjected to selection. We computed  
244 two models in order to calculate and compare the likelihood values: a null model with a fixed  $\omega$   
245 value of 1 and an alternative model that estimates  $\omega$  in the foreground branch, which is *G.*  
246 *morbida* in our case. In the effort to reduce false positives, we implemented the Benjamini-  
247 Hochberg correction method when comparing likelihood ratios for null and alternative models  
248 using a *P*-value threshold of 0.05. We performed similar BLAST searches as mentioned  
249 previously to characterize the functions of these proteins and identify proteins with signal  
250 peptides and transmembrane domains.

251 We repeated the above procedures for detecting genes under selection in *Grosmannia*  
252 *clavigera* because this fungal pathogen plays an ecological role similar to *G. morbida*. By  
253 performing these analyses, we sought to uncover genes under adaptive evolution in both  
254 beetle-vectored tree pathogens.

### 255 **Sequence data and code availability**

256 The raw reads and assembled genomes reported in this paper are available at European  
257 Nucleotide Archive under Project Number PRJEB13066. The in silico generated transcript and  
258 protein files are being deposited at Dryad. The code is available at Github  
259 (<https://github.com/tarunaaggarwal/G.morbida.Comp.Gen>)

## 260 **Results**

### 261 **Assembly features**

262 We recently assembled a reference genome for a *G. morbida* strain isolated from *Juglans*  
263 *californica* in Southern California (Schuelke *et al.*, 2016). The reference contained 73 scaffolds  
264 with an estimated size of 26.5 Mbp. By using the MAKER annotation pipeline, we predicted  
265 6,273 protein models in this reference in-silico (Cantarel *et al.*, 2008). In this work, we  
266 sequenced strains of *G. flava* and *G. putterillii* at approximately 102x and 131x coverage,  
267 respectively. The *G. flava* assembly was composed of 1,819 scaffolds totaling 29.47 Mbp in  
268 length, and the *G. putterillii* genome contained 320 scaffolds extending 29.99 Mbp. *G. flava* and  
269 *G. putterillii* totaled 6,976 and 7,086 protein models, respectively. Both genomes contained 98%  
270 of the single-copy orthologs present in more than 90% of the fungal species. Nearly all of the  
271 raw reads (97% and 98%) mapped back to *G. flava* and *G. putterillii* genome assemblies,  
272 respectively (Table 4). These statistics indicated that our genome assemblies are high quality  
273 and complete.

274 An estimated 0.80% of *G. morbida* reference genome sequence represented repeats,  
275 whereas 0.63% and 0.64% of the sequences in *G. flava* and *G. putterillii* consisted of repetitive

276 elements. There were 60, 42, and 15 DNA transposons in *G. morbida*, *G. flava*, and *G. putterillii*,  
277 respectively. Furthermore, *G. morbida* possessed only 152 retroelements, whereas *G. flava* and  
278 *G. putterillii* had 401 and 214 of such elements, correspondingly (Table 5).

279         Although, the extent to which mobile genetic elements affect genome evolution in  
280 *Geosmithia* is unknown, mobile genetic elements may be influential drivers of adaptive evolution  
281 in *G. morbida*. They are known to be responsible for genomic rearrangements and expansion,  
282 horizontal gene transfer and generation of new genes (Casacuberta & Gonzalez 2013;  
283 Stukenbrock & Croll 2014). For example, *Fusarium oxysporum* has a genome nearly 60 Mbp in  
284 length and contains 16.83 Mbp of repetitive sequences. *F. oxysporum* also contained four more  
285 chromosomes than closely related species, and the added chromosomes were rich in  
286 transposons and genes such as putative effectors, necrosis and ethylene-inducing proteins and  
287 carbohydrate binding enzymes (Ma *et al.*, 2010). Although *Geosmithia morbida* harbors fewer  
288 mobile genetic elements than fungal species such as *F. oxysporum*, it is possible that such  
289 elements have contributed to the evolution of pathogenicity in *Geosmithia* via gene expansion  
290 and/or horizontal gene transfer. Understanding the role of mobile genetic elements within genus  
291 *Geosmithia* may be key in discovering the genetic basis behind the evolution of pathogenicity.

#### 292 **Identifying putative genes involved in pathogenicity**

293 Approximately 32%, 34%, and 35% of the total proteins in *G. morbida*, *G. flava* and *G. putterillii*  
294 respectively shared significant homology with protein sequences in the database. The number  
295 of unknown proteins with hits in the PHI-base database was similar for *G. morbida* (26), *G. flava*  
296 (28), and *G. putterillii* (36). The full BLASTp search results against the PHI-base database for *G.*  
297 *morbida*, *G. flava*, and *G. putterillii* are available in the supporting material (Table S1).

#### 298 **Identifying species-specific genes**

299 The three *Geosmithia* species and *A. chrysogenum* contained a total of 9065 orthologs and  
300 paralogs. Among the set of homologous genes there were 4,655 single copy orthologs. *A.*  
301 *chrysogenum* contained 2338 species-specific genes, of which seven genes were paralogous.

302 *G. morbida* possessed 76 unique genes whereas, *G. putterilli* and *G. flava* had 161 and 146  
303 species-specific genes. The two nonpathogenic *Geosmithia* species did not contain any  
304 paralogs, however *G. morbida* had three unique genes present in multiple copies. Based on a  
305 functional search against NCBI's non-redundant database, the three genes encode  
306 hydantoinase B/oxoprolinase, aldehyde dehydrogenase, and ABC-2 type transporter.

307 These findings are significant because all three of these proteins are involved in stress  
308 responses that can be induced by the host immune system during the infection process. For  
309 example, aldehyde dehydrogenases are part of a large protein family that detoxify aldehydes  
310 and alcohols in all organisms including fungal species (Asiimwe *et al.*, 2012). Hydantoinase  
311 B/oxoprolinase is involved in the synthesis of glutathione, a compound essential for basic  
312 cellular functions but also important in cellular defense against oxidative stress (Pocsi *et al.*,  
313 2004). Glutathione has been shown to chelate damaging metal ions by inhibiting their spread in  
314 the cell (Pocsi *et al.*, 2004), and to prevent the accumulation of H<sub>2</sub>O<sub>2</sub> in *Paxillus involutus* (Ott *et*  
315 *al.*, 2002). Lastly, ATP-binding cassette (ABC) proteins belong to an especially large family of  
316 proteins that regulates transport of substances across the cellular membrane. In pathogenic  
317 fungi, they are involved in drug resistance and in the production of defense molecules  
318 (Krattinger *et al.*, 2009; Wang *et al.*, 2013; Karlsson *et al.*, 2015).

### 319 **Identifying putative secreted proteins**

320 A total of 349, 403, and 395 proteins in *G. morbida*, *G. flava*, and *G. putterillii* contained signal  
321 peptides respectively. Of these putative signal peptide-containing proteins in *G. morbida*, 27  
322 (7.7%) encoded proteins with unknown function, whereas *G. flava* and *G. putterillii* contained 29  
323 (7.2%) and 30 (7.6%) unknown proteins, respectively. The difference in percent of unknown  
324 proteins with signal peptides was minimal among the three genomes. For each species,  
325 proteins containing signal peptides were subjected to a membrane protein topology search  
326 using TMHMM v2.0. There were 237, 281, and 283 proteins in *G. morbida*, *G. flava*, and *G.*

327 *putterillii* that lacked any transmembrane protein domains. Again, these numbers were not  
328 significantly different.

### 329 **Profiling carbohydrate active enzymes and peptidases**

330 CAZymes are carbohydrate active enzymes that break down plant structural components,  
331 enabling initiation and establishment of infection. We assessed the CAZymatic profile of all  
332 species in the order *Hypocreales*, *Geosmithia* species, and *Grosmannia clavigera* (Figure 1).  
333 The glycoside hydrolase (GH) family members dominated all protein models, followed by  
334 glycosyltransferase (GT) family. The two most prominent families among all fungal species were  
335 GH3 and GH16 (Table S2). GH3 hydrolases are involved in cell wall degradation and  
336 overcoming the host immune system, and GH16 enzymes fulfill a wide range of cellular  
337 functions including transporting amino acids. The third most representative family was GH18;  
338 however *G. morbida* only contained 4 of these enzymes. In contrast, this number for other  
339 species ranges from 9 to 31 enzymes. Along with acetylglucosaminidases, family GH18 harbors  
340 chitinases that assist in the production of carbon and nitrogen. In terms of other CAZyme  
341 families, all fungi except *F. solani* express a similar overall distribution. *Fusarium solani*  
342 contains more CAZymes than any other pathogen or non-pathogen. This *Fusarium* species is a  
343 generalist necrotrophic pathogen that is believed to possess more CAZymes than biotrophic  
344 and hemibiotrophic fungi. This discrepancy may be due to the fact that necrotrophic pathogens  
345 require an extensive toolkit to promote host cell death as quickly as possible; whereas biotrophs  
346 need to keep the host alive, and dispensing large number of degradation enzymes can be  
347 detrimental to that aim (Zhao *et al.*, 2013).

348 In addition to profiling CAZymes, we also performed a BLAST search against the  
349 peptidase database—Merops v10.0 (Rawlings *et al.*, 2016)-- for each *Hypocreales*, *Ceratocystis*  
350 *platani*, and *G. clavigera*. Among the pathogens, *G. morbida* has the third highest percent of  
351 predicted proteases after *Cordyceps militaris* (insect pathogen) and *G. clavigera* (Figure 2,  
352 Table S3). Moreover, *Geosmithia flava* and *G. putterillii* have the largest percent of peptidases

353 among the nonpathogenic fungi. All three *Geosmithia* species illustrate similar proteolytic  
354 profiles and contain no glutamic and mixed peptidases. These results were expected because  
355 all three *Geosmithia* species are closely related. Furthermore, given that these species are plant  
356 affiliates (except *Cordyceps militaris*), the ability to degrade lignin and cellulose is an important  
357 life history trait that is conserved throughout fungal pathogens, but perhaps did not give rise to  
358 pathogenicity in *G. morbida*.

### 359 **Inferring phylogeny**

360 Even though *Geosmithia* was first established as a genus in 1979, it has only recently been  
361 described in depth. One of the main objectives in this study was to uncover the phylogenetic  
362 relationship between *Geosmithia* species and other fungal pathogens using coding DNA  
363 sequence data. In order to determine the broader evolutionary history of *Geosmithia* species,  
364 we constructed maximum likelihood (ML) and Bayesian Markov Chain Monte Carlo (BMCMC)  
365 phylogenies using 1,916 single-copy orthologs from *G. morbida*, *G. putterillii*, *G. flava*, and 17  
366 additional fungal taxa (Table 3). Our final dataset consisted of 11 pathogens and 9 non-  
367 pathogens. After trimming and filtering, our 1,916 orthogroups contained approximately  $1e10^6$   
368 amino acid sites in total. The topologies of trees generated under ML and BMCMC were  
369 identical, and all nodes in all analyses received bootstrap support of 100% (ML) and posterior  
370 probabilities of 1.0 (BMCMC). The analyses resulted in a single, identical tree topology (Figure  
371 3) that was supported by previous research (Fitzpatrick *et al.*, 2006, Wang *et al.*, 2009).

372 *Geosmithia* species form a monophyletic clade with two nonpathogenic fungi—*Acremonium*  
373 *chrysogenum* and *Stanjemonium griseum*—indicating that the common ancestor shared among  
374 these species was not a pathogen.

### 375 **Genes under positive selection**

376 In order to understand the molecular basis of pathogenicity in *G. morbida*, we sought to detect  
377 genes under positive selection. For this, we first searched for all single-copy orthologs shared  
378 among the 9 non-pathogens and *G. morbida* using OrthoFinder (v0.3.0). We extracted the

379 corresponding coding sequences for each protein in the 3,327 orthogroups containing 1:1  
380 orthologs using a custom python script. These orthogroups were aligned using MACSE v1.01b  
381 and cleaned with PAL2NAL v14. After alignment and cleaning of orthogroups there were 2,798  
382 multiple sequence alignments that were used for selection analysis.

383 To identify coding sequences and sites under selection, we leveraged the branch-site  
384 model in PAML's codeml program (4.8). *Geosmithia morbida* was selected as the foreground  
385 branch. Our results showed 38 genes to be under positive selection using an adjusted  $P$ -value <  
386 0.05. Next, we performed a functional search for each protein by blasting the peptide sequences  
387 against the NCBI non-redundant and pfam databases. We determined that several were  
388 involved in catabolic activity, gene regulation, and cellular transport (Table 6, Table S4).

389 For instance, a cullin3-like protein was predicted to be under positive selection. Cullin3-  
390 like proteins belong to a group of structurally similar molecules involved in protein degradation,  
391 such as the Skp-Cullin-F-box (SCF) ubiquitin ligase complex, was predicted to be under positive  
392 selection (Cardozo & Pagano 2004; Pintard *et al.*, 2004). Furthermore, a ubiquitin-conjugating  
393 enzyme (E2) that interacts with cullin3 to prepare substrate for degradation, also had a  $dn/ds$  >  
394 1, indicating that both genes are under positive selection within *G. morbida*. Although little is  
395 known regarding the precise functional abilities of these complexes, it is possible these proteins  
396 are involved in pathogenicity of *G. morbida*. Previous studies have also implicated ubiquitin  
397 ligase complexes in infection and disease development (Duyvesteijn *et al.*, 2005; Han *et al.*,  
398 2007).

399 Our analysis also revealed a regulatory protein homologous to basic leucine zipper  
400 (bZIP) transcription factors was under selection. The bZIP proteins are similar to AP-1  
401 transcription factors and monitor several developmental and physiological processes including  
402 oxidative stress responses in eukaryotes (Corrêa *et al.*, 2008). Fungal pathogens such as the  
403 rice blast fungus *Magnaporthe oryzae* express AP1-like transcription factor called MoAP1 that  
404 contains bZIP domain. MoAP1 is highly active during infection and is translocated from the



405 cytoplasm to the nucleus in response to oxidative stress induced by H<sub>2</sub>O<sub>2</sub> (Guo *et al.*, 2011).  
406 MoAP1 regulates enzymes such as laccase and glutamate decarboxylase that are involved in  
407 lignin breakdown and metabolism of  $\gamma$ -aminobutyric acid, respectively (Solomon & Oliver 2002;  
408 Baldrian 2005; Janusz *et al.*, 2013). Some of the other positively selected genes include ABC  
409 transporter, proteases, proteins involved in apoptosis, and proteins related to DNA replication  
410 and repair. As previously mentioned, ABC transporters are important mediators that aid in  
411 protection against plant defenses as well as natural toxic compounds (Krattinger *et al.*, 2009;  
412 Wang *et al.*, 2013; Karlsson *et al.*, 2015; Lo Presti *et al.*, 2015). Apoptosis or programmed cell  
413 death helps establish resistance during host-microbe interactions, helps organisms cope with  
414 oxidative environments, and may even be essential for infection (Veneault-Fourrey *et al.*, 2006;  
415 Kabbage *et al.*, 2013). In fungal species, proteins involved in DNA replication and repair are  
416 essential for the formation and penetration of appressorial structures into the host cell (Son *et*  
417 *al.*, 2016). Only five of the 38 genes with evidence of selection encoded proteins with unknown  
418 functions. These positively selected genes might be involved in the evolution and adaptation of  
419 *G. morbida*.

#### 420 **Transmembrane protein and effector genes**

421 Transmembrane proteins are important mediators between a host and its pathogens  
422 during microbial invasion. Fungal pathogens either penetrate a surface or enter the host through  
423 a wound or opening such as stomata in order to gain access to the nutrients in the plant  
424 (Chisholm *et al.*, 2006). Once the infiltration process is completed, pathogens are exposed to  
425 host plasma membrane receptors that detect pathogen-associated molecular patterns (PAMP)  
426 and induce PAMP-triggered immunity (PTI) to prevent further proliferation of the microbe.  
427 Transmembrane proteins expressed by a fungal pathogen are crucial during PTI because they  
428 are responsible for suppressing PTI directly or by secreting effector molecules, which contain  
429 signal peptides necessary for proper targeting and transport (Chisholm *et al.*, 2006; Boller & He  
430 2009). Our analysis of the 38 proteins under positive selection showed that 11 of these possess

431 at least one or more transmembrane domains. Although nearly 30% of the positively selected  
432 genes identified were membrane bound, a similar proportion of non-selected genes in *G.*  
433 *morbida* were membrane associated, so this result is not strong evidence that interactions with  
434 the host surface are drivers of evolution within *G. morbida*. Among proteins under selection we  
435 found no protein that contained a signal peptide, indicating none of these proteins are secretory.

### 436 **Genes under adaptive evolution in beetle-vectored fungal pathogens**

437 In addition to detecting genes under selective pressures in *G. morbida*, we performed  
438 the same selection analysis for *Grosmannia clavigera* to identify overlapping proteins that may  
439 help explain adaptations leading to the ecological role these two beetle-vectored fungi play. We  
440 found that *G. clavigera* possessed 42 positively selected genes that shared protein domains  
441 with only two of the 38 genes predicted to be under selection in *G. morbida*. The two  
442 overlapping motifs are methyltransferase and protein kinase domains. Our KEGG analysis  
443 exhibited no common pathways between *G. morbida* and *G. clavigera*. These findings  
444 emphasize that evolutionary forces act differently on divergent populations. All fungal pathogens  
445 face dissimilar environmental challenges and associate with different hosts both spatially and  
446 temporally. Even closely related organisms can be highly distinct molecularly. For instance, the  
447 fungi responsible for the Dutch elm disease—*Ophiostoma ulmi* and *O. novo-ulmi*—differ in their  
448 genetic composition and virulence despite their strong evolutionary relationship (Brasier 2001;  
449 Khoshraftar *et al.*, 2013; Comeau *et al.*, 2015).

### 450 **Discussion**

451 This study aims to provide insight into the evolution of pathogenicity within *Geosmithia morbida*,  
452 a beetle vectored pathogen that is the causal agent of Thousand Cankers Disease in *Julgans*  
453 species. Here, we present *de novo* genome assemblies of two nonpathogenic *Geosmithia*  
454 species, *G. flava* and *G. putterillii*, and employ comparative genomics approach to uncover the  
455 molecular factors contributing to pathogenicity in *G. morbida*.

456 *G. flava* and *G. putterillii* have estimated genome sizes of 29.6 Mbp and 30.0 Mbp,  
457 correspondingly. These assemblies are larger than the genome of *G. morbida*, which measures  
458 26.5 Mbp in length. In contrast to other species in the phylogeny (Figure 3), fungi associated  
459 with trees either as pathogens or saprophytes (*Geosmithia* species, *G. clavigera*, and *C. platani*)  
460 had reduced genomes and gene content. We predict this genome and gene content reduction is  
461 a result of evolving specialized lifestyles to occupy a specialized niche. For instance, all three  
462 *Geosmithia* species and *G. clavigera* are vectored into their respective hosts via bark beetles,  
463 which may result in strong selection on the genetic variability of the fungi because they must  
464 adapt to their vectors and hosts simultaneously. Moreover, possessing genes that are not  
465 essential for this specialized lifestyle may impose a fitness disadvantage on the pathogen, as  
466 they may represent potential targets for host resistance genes. A recent study characterizing the  
467 genome of mycoparasite *Escovopsis weberi* showed that specialized pathogens tend to have  
468 smaller genomes and predicted protein sets because they lack genes that are not required  
469 beyond their restricted niche when compared to closely related generalists (de Man *et al.*,  
470 2016). Our results agree with this finding because *G. morbida* has a more specialized beetle  
471 vector (*P. juglandis*) and plant host range (*Juglans* species) in comparison to *G. putterilli* and *G.*  
472 *flava* which can be found on a variety of trees species including both gymnosperms and  
473 angiosperms (Kolařík *et al.*, 2004; Kolařík & Jankowiak 2013), and can be vectored by multiple  
474 beetle species (Kolařík *et al.*, 2008.) This represents a significant contrast to previous reports  
475 that have documented the importance of genome expansion with the evolution of pathogenicity  
476 (Adhikari *et al.*, 2014; Raffaele & Kamoun 2012). Furthermore, our results are supported by  
477 prior findings which showed that gene loss and gain can lead to a more specialized lifestyle in  
478 bacterial and eukaryotic lineages (Ochman & Moran 2001, Lawrence 2005). Another example is  
479 a study by Nagendran *et al.*, 2009 that showed *Amanita bisporigera*, which is an obligate  
480 ectomycorrhizal symbiont, lacks many plant cell-wall-degrading enzymes suggesting that these  
481 genes may no longer be required for *A. bisporigera*'s specialized lifestyle.

482           Genome reduction is an important evolutionary mechanism that propels divergence of  
483 species and more often than not enables adaptation to specific environments. Although genome  
484 reduction is more frequent in prokaryotes, it is not uncommon among eukaryotes including  
485 fungal species (Ochman and Moran 2001, Nagendran *et al.*, 2009, Spanu *et al.*, 2010).

486           Although one might expect the pathogen *G. morbida* to possess more carbohydrate  
487 binding enzymes and peptidases than its non-pathogenic relatives, our results indicated that all  
488 three species had similar enzymatic profiles (Figures 1 and 2). Despite these similarities, our  
489 PAML analysis identified 38 genes under positive selection in *G. morbida* when compared to  
490 other nonpathogens within the order Hypocreales including non-pathogenic *Geosmithia* species.  
491 These genes encode for proteins that have been implicated in pathogenicity in other fungal  
492 pathogens such as *Magnaporthe oryzae*. Additionally, we found peptides with protein kinase  
493 and methyltransferase domains that are under positive selection in both *G. morbida* and *G.*  
494 *clavigera*. Proteins kinases were previously shown to be under strong positive selection in *G.*  
495 *clavigera* (Alamouti *et al.*, 2014). This result was especially important given the key contributions  
496 that protein kinases make in initiating signal transduction pathways during pathogen host  
497 interactions. Our study identified a small set of genes potentially involved in the evolution of  
498 pathogenicity in the genus *Geosmithia*. Functional experiments and analyses of the expression  
499 levels of these genes during infection as compared to gene expression of a non-pathogen would  
500 shed light on the mechanisms influencing pathogen evolution and genome reduction.

501

502

503

504

505

506

## 507 **Acknowledgments**

508 The use of trade names is for the information and convenience of the reader and does not imply official  
509 endorsement or approval by the United States Department of Agriculture or the Forest Service of any  
510 product to the exclusion of others that may be suitable. Partial funding was provided by the New  
511 Hampshire Agricultural Experiment Station. Special thanks to Dr. Miroslav Kolarik for providing isolates of  
512 *Geosmithia flava* and *Geosmithia putterilli*. We are also grateful to Dr. Joseph Spatafora and his team for  
513 giving us permission to utilize sequence data for *Stanjemonium griseum* and *Myrothecium inundatum*.  
514 Lastly, we thank the 1000 Fungal Genomes Project for being a valuable source of genetic data.

515

## 516 **Author contribution**

517 TAS conceived, designed and performed the experiments and wrote the manuscript. AW assembled and  
518 annotated the genomes. KB conceived and designed the study, wrote and reviewed the manuscript. KB  
519 also conceived funding. DCP designed and implemented the phylogenetic methods in this study and  
520 reviewed the manuscript. KW conceived funding and designed the experiments. KW also wrote and  
521 reviewed the manuscript. MDM conceived and designed the study, developed analyses pipelines and  
522 edited the manuscript.

523

## 524 **References**

- 525 **Adhikari BN, Hamilton JP, Zerillo MM, Tisserat N, Lévesque CA, Buell CR. 2013.**  
526 Comparative genomics reveals insight into virulence strategies of plant pathogenic  
527 oomycetes. *PLoS One* **8**: e75072.
- 528 **Alamouti SM, Haridas S, Feau N, Robertson G, Bohlmann J, Breuil C. 2014.**  
529 Comparative genomics of the pine pathogens and beetle symbionts in the genus  
530 *Grosmannia*. *Molecular biology and evolution* **31**: 1454-1474.
- 531 **Altschul SF, Gish W, Miller W, Myers EW, Lipman DJ. 1990.** Basic local alignment search  
532 tool. *Journal of Molecular Biology* **215**: 403–410.
- 533 **Amselem J, Cuomo CA, Van Kan JA, Viaud M, Benito EP, Couloux A, Coutinho PM, De**  
534 **Vries RP, Dyer PS, Fillinger S et al. 2011.** Genomic analysis of the necrotrophic fungal  
535 pathogens *Sclerotinia sclerotiorum* and *Botrytis cinerea*. *PLoS Genetics* **7**: e1002230.

- 536 **Asiimwe T, Krause K, Schlunk I, Kothe E. 2012.** Modulation of ethanol stress tolerance by  
537 aldehyde dehydrogenase in the mycorrhizal fungus *Tricholoma vaccinum*. *Mycorrhiza*  
538 **22:** 471-484.
- 539 **Baldrian P. 2005.** Fungal laccases-occurrence and properties. *FEMS Microbiology Reviews*  
540 **30:** 215-242.
- 541 **Belbahri L. 2015.** Genome sequence of *Ceratocystis platani*, a major pathogen of plane  
542 trees. [WWW document] URL <http://www.ncbi.nlm.nih.gov/nucleotide/814603118>.
- 543 **Berka RM, Grigoriev IV, Otiillar R, Salamov A, Grimwood J, Reid I, Ishmael N, John T,**  
544 **Darmond C, Moisan MC et al. 2011.** Comparative genomic analysis of the thermophilic  
545 biomass-degrading fungi *Myceliophthora thermophila* and *Thielavia terrestris*. *Nature*  
546 *Biotechnology* **29:** 922-927.
- 547 **Blanco-Ulate B, Rolshausen PE, Cantu D. 2013.** Draft Genome Sequence of the  
548 Grapevine Dieback Fungus *Eutypa lata* UCR-EL1. *Genome Announcements* **1:** e00228-  
549 13.
- 550 **Bolger AM, Lohse M, Usadel B. 2014.** Trimmomatic: a flexible trimmer for Illumina  
551 sequence data. *Bioinformatics* **30:** 2114-2120.
- 552 **Boller T, He SY. 2009.** Innate immunity in plants: An arms race between pattern recognition  
553 receptors in plants and effectors in microbial pathogens. *Science* **324:** 742-744.
- 554 **Boutet, E, Lieberherr D, Tognolli M, Schneider M, Bansal P, Bridge AJ, Poux S,**  
555 **Bougueleret L, Xenarios I. 2016.** UniProtKB/Swiss-Prot, the manually annotated  
556 section of the UniProt KnowledgeBase: how to use the entry view. *Plant Bioinformatics:*  
557 *Methods and Protocols* 23-54. [WWW document] URL <http://www.uniprot.org/>.  
558 [accessed 6 May 2015].
- 559 **Brasier CM. 2001.** Rapid Evolution of Introduced Plant Pathogens via Interspecific  
560 Hybridization Hybridization is leading to rapid evolution of Dutch elm disease and other  
561 fungal plant pathogens. *Bioscience* **51:** 123-133.
- 562 **Cantarel BL, Korf I, Robb SMC, Parra G, Ross E, Moore B. 2008.** MAKER: An easy-to-  
563 use annotation pipeline designed for emerging model organism genomes. *Genome*  
564 *Research* **18:** 188-196
- 565 **Capella-Gutiérrez S, Silla-Martínez JM, Gabaldón T. 2009.** trimAl: a tool for automated  
566 alignment trimming in large-scale phylogenetic analyses. *Bioinformatics* **25:** 1972-1973.
- 567 **Cardozo T, Pagano M. 2004.** The SCF ubiquitin ligase: insights into a molecular machine.  
568 *Nature Reviews Cell Biology* **5:** 739-751.

- 569 **Casacuberta E, González J. 2013.** The impact of transposable elements in environmental  
570 adaptation. *Molecular ecology* **22**: 1503-1517.
- 571 **Chisholm ST, Coaker G, Day B, Staskawicz BJ. 2006.** Host-microbe interactions: shaping  
572 the evolution of the plant immune response. *Cell* **124**: 803-814.
- 573 **Coleman JJ, Rounsley SD, Rodriguez-Carres M, Kuo A, Wasmann CC, Grimwood J,  
574 Schmutz J, Taga M, White GJ, Zhou S et al. 2009.** The genome of *Nectria*  
575 *haematococca*: contribution of supernumerary chromosomes to gene expansion. *PLoS*  
576 *Genetics* **5**: e1000618.
- 577 **Comeau AM, Dufour J, Bouvet GF, Jacobi V, Nigg M, Henrissat B, Laroche J,  
578 Levesque RC, Bernier L. 2015.** Functional annotation of the *Ophiostoma novo-ulmi*  
579 genome: insights into the phytopathogenicity of the fungal agent of Dutch elm disease.  
580 *Genome biology and evolution* **7**: 410-430.
- 581 **Corrêa LG, Riaño-Pachón DM, Schrago CG, dos Santos RV, Mueller-Roeber B,  
582 Vincentz M. 2008.** The Role of bZIP Transcription Factors in Green Plant Evolution:  
583 Adaptive Features Emerging from Four Founder Genes. *PLoS One* **3**: e2944.
- 584 **Crusoe MR, Alameldin HF, Awad S, Boucher E, Caldwell A, Cartwright R,  
585 Charbonneau A, Constantinides B, Edvenson G, Fay S et al. 2015.** The khmer  
586 software package: enabling efficient nucleotide sequence analysis. *F1000Research*  
587 **4**: 900.
- 588 **Cuomo CA, Güldener U, Xu JR, Trail F, Turgeon BG, Di Pietro A, Walton JD, Ma LJ,  
589 Baker SE, Rep M et al. 2007.** The *Fusarium graminearum* genome reveals a link  
590 between localized polymorphism and pathogen specialization. *Science* **317**: 1400-1402.
- 591 **de Man TJ, Stajich JE, Kubicek CP, Teiling C, Chenthamara K, Atanasova L,  
592 Druzhinina IS, Levenkova N, Birnbaum SS, Barribeau SM et al. 2016.** Small genome  
593 of the fungus *Escovopsis weberi*, a specialized disease agent of ant agriculture.  
594 *Proceedings of the National Academy of Sciences, USA* **113**: 3567-3572.
- 595 **DiGuistini S, Wang Y, Liao NY, Taylor G, Tanguay P, Feau N, Henrissat B, Chan SK,  
596 Hesse-Orce U, Alamouti SM et al. 2011.** Genome and transcriptome analyses of the  
597 mountain pine beetle-fungal symbiont *Grosmannia clavigera*, a lodgepole pine pathogen.  
598 *Proceedings of the National Academy of Sciences, USA* **108**: 2504-2509.
- 599 **Duyvesteijn RG, Van Wijk R, Boer Y, Rep M, Cornelissen BJ, Haring MA. 2005.** Frp1 is  
600 a *Fusarium oxysporum* F $\square$ box protein required for pathogenicity on tomato. *Molecular*  
601 *microbiology* **57**: 1051-1063.
- 602 **Eddy SR. 1998.** Profile hidden Markov models. *Bioinformatics* **14**: 755-63.

- 603 **Emms DM, Kelly S. 2015.** OrthoFinder: solving fundamental biases in whole genome  
604 comparisons dramatically improves orthogroup inference accuracy. *Genome Biology* **16**:  
605 2-14.
- 606 **Fitzpatrick DA, Logue ME, Stajich JE, Butler G. 2006.** A fungal phylogeny based on 42  
607 complete genomes derived from supertree and combined gene analysis. *BMC*  
608 *Evolutionary Biology* **6**: 99.
- 609 **Galagan JE, Calvo SE, Borkovich KA, Selker EU, Read ND, Jaffe D, FitzHugh W, Ma**  
610 **LJ, Smirnov S, Purcell S et al. 2003.** The genome sequence of the filamentous fungus  
611 *Neurospora crassa*. *Nature* **422**: 859-868.
- 612 **Guo M, Chen Y, Du Y, Dong Y, Guo W, Zhai S, Zhang H, Dong S, Zhang Z, Wang Y et**  
613 **al. 2011.** The bZIP Transcription Factor MoAP1 Mediates the Oxidative Stress  
614 Response and Is Critical for Pathogenicity of the Rice Blast Fungus *Magnaporthe*  
615 *oryzae*. *PLoS Pathogens* **7**: e1001302.
- 616 **Gurevich A, Saveliev V, Vyahhi N, Tesler G. 2013.** QUAST: quality assessment tool for  
617 genome assemblies. *Bioinformatics* **29**: 1072–1075.
- 618 **Han YK, Kim MD, Lee SH, Yun SH, Lee YW. 2007.** A novel F-box protein involved in  
619 sexual development and pathogenesis in *Gibberella zeae*. *Molecular Microbiology* **63**:  
620 768-779.
- 621 **Janusz G, Kucharzyk KH, Pawlik A, Staszczak M, Paszczynski AJ. 2013.** Fungal  
622 laccase, manganese peroxidase and lignin peroxidase: Gene expression and regulation.  
623 *Enzyme and Microbial Technology* **52**: 1-12.
- 624 **Kabbage M, Williams B, Dickman MB. 2013.** Cell death control: the interplay of apoptosis  
625 and autophagy in the pathogenicity of *Sclerotinia sclerotiorum*. *PLoS Pathogens* **9**:  
626 e1003287.
- 627 **Karlsson M, Durling MB, Choi J, Kosawang C, Lackner G, Tzelepis GD, Nygren K,**  
628 **Dubey MK, Kamou N, Levasseur A, Zapparata A. 2015.** Insights on the evolution of  
629 mycoparasitism from the genome of *Clonostachys rosea*. *Genome biology and*  
630 *evolution*. **7**: 465-480.
- 631 **Katoh K, Standley DM. 2013.** MAFFT Multiple Sequence Alignment Software Version 7:  
632 Improvements in Performance and Usability. *Molecular Biology Evolution* **30**: 772-780.
- 633 **Kersey PJ, Allen JE, Armean I, Boddu S, Bolt BJ, Carvalho-Silva D, Christensen M,**  
634 **Davis P, Falin LJ, Grabmueller C et al. 2016.** Ensembl Genomes 2016: more  
635 genomes, more complexity. *Nucleic acids research* **44**: D574-80. [WWW document]  
636 URL <http://fungi.ensembl.org/index.html>. [accessed 14 November 2015].



- 637 **Khoshraftar S, Hung S, Khan S, Gong Y, Tyagi V, Parkinson J, Sain M, Moses AM,**  
638 **Christendat D. 2013.** Sequencing and annotation of the *Ophiostoma ulmi* genome.  
639 *BMC genomics* **14**: 162.
- 640 **Kohler A, Francis M, Costa M. 2011.** High quality genomic DNA extraction using CTAB  
641 and Qiagen genomic-tip (version 2). [WWW document] URL  
642 [http://1000.fungalgenomes.org/home/wp-](http://1000.fungalgenomes.org/home/wp-content/uploads/2013/02/genomicDNAProtocol-AK0511.pdf)  
643 [content/uploads/2013/02/genomicDNAProtocol-AK0511.pdf](http://1000.fungalgenomes.org/home/wp-content/uploads/2013/02/genomicDNAProtocol-AK0511.pdf) [accessed 12 December  
644 2015].
- 645 **Kohler A, Kuo A, Nagy LG, Morin E, Barry KW, Buscot F, Canbäck B, Choi C, Cichocki**  
646 **N, Clum A et al. 2015.** Convergent losses of decay mechanisms and rapid turnover of  
647 symbiosis genes in mycorrhizal mutualists. *Nature Genetics* **47**: 410-415.
- 648 **Kolarik M, Freeland E, Utley C, Tisserat N. 2011.** *Geosmithia morbida* sp. nov., a new  
649 phytopathogenic species living in symbiosis with the walnut twig beetle (*Pityophthorus*  
650 *juglandis*) on *Juglans* in USA. *Mycologia* **103**: 325–332.
- 651 **Kolarik M, Jankowiak R. 2013.** Vector Affinity and Diversity of *Geosmithia* Fungi Living on  
652 Subcortical Insects Inhabiting *Pinaceae* Species in Central and Northeastern Europe.  
653 *Microbial Ecology* **66**: 682–700.
- 654 **Kolarik M, Kirkendall LR. 2010.** Evidence for a new lineage of primary ambrosia fungi in  
655 *Geosmithia Pitt* (Ascomycota: Hypocreales). *Fungal Biology* **114**: 676–689.
- 656 **Kolarik M, Kostovcik M, Pazoutova S. 2007.** Host range and diversity of the genus  
657 *Geosmithia* (Ascomycota: Hypocreales) living in association with bark beetles in the  
658 Mediterranean area. *Mycological Research* **111**: 1298–1310.
- 659 **Kolarik M, Kubatova A, van Cepicka I, Pazoutova S, Srutka P. 2005.** A complex of three  
660 new white-spored, sympatric, and host range limited *Geosmithia* species. *Mycological*  
661 *Research* **109**:1323–1336.
- 662 **Korf I. 2004.** Gene finding in novel genomes. *BMC bioinformatics* **5**: 1.
- 663 **Krattinger SG, Lagudah ES, Spielmeier W, Singh RP, Huerta-Espino J, McFadden H,**  
664 **Bossolini E, Selter LL, Keller B. 2009.** A putative ABC transporter confers durable  
665 resistance to multiple fungal pathogens in wheat. *Science* **323**: 1360-1363.
- 666 **Krogh A, Larsson B, von Heijne G, Sonnhammer ELL. 2001.** Predicting transmembrane  
667 protein topology with a hidden Markov model: Application to complete genomes. *Journal*  
668 *of Molecular Biology* **305**: 567-580.
- 669 **Kubicek CP, Herrera-Estrella A, Seidl-Seiboth V, Martinez DA, Druzhinina IS, Thon M,**  
670 **Zeilinger S, Casas-Flores S, Horwitz BA, Mukherjee PK, Mukherjee M. 2011.**

- 671 Comparative genome sequence analysis underscores mycoparasitism as the ancestral  
672 life style of *Trichoderma*. *Genome Biology* **12**: R40.
- 673 **Lanfear R, Calcott B, Kainer D, Mayer C, Stamatakis A. 2014.** Selecting optimal  
674 partitioning schemes for phylogenomic datasets. *BMC Evolutionary Biology* **14**: 82. □
- 675 **Lawrence JG. 2005.** Common themes in the genome strategies of pathogens. *Current*  
676 *opinion in genetics & development* **15**: 584-588.
- 677 **Li H, Durbin R. 2009.** Fast and accurate short read alignment with Burrows-Wheeler  
678 transform. *Bioinformatics* **25**: 1754–1760.
- 679 **Li H. 2015.** BFC: correcting Illumina sequencing errors. *Bioinformatics* **31**: 2885-2887.
- 680 **Lo Presti L, Lanver D, Schweizer G, Tanaka S, Liang L, Tollot M, Zuccaro A,**  
681 **Reissmann S, Kahmann R. 2015.** Fungal effectors and plant susceptibility. *Annual*  
682 *review of plant biology* **66**: 513-545.
- 683 **Lombard V, Golaconda Ramulu H, Drula E, Coutinho PM, Henrissat B. 2014.** The  
684 **Carbohydrate-active enzymes database (CAZy) in 2013.** *Nucleic Acids Research* **42**:  
685 D490-495.
- 686 **Lynch SC, Wang DH, Mayorquin JS, Rugman-Jones PF, Stouthamer R, Eskalen E.**  
687 **2014.** First Report of *Geosmithia pallida* Causing Foamy Bark Canker, a new disease on  
688 coast live oak (*Quercus agrifolia*), in association with *Pseudopityophthorus pubipennis* in  
689 California. *Plant Disease* **98**: 1276.
- 690 **Ma LJ, Van Der Does HC, Borkovich KA, Coleman JJ, Daboussi MJ, Di Pietro A,**  
691 **Dufresne M, Freitag M, Grabherr M, Henrissat B et al. 2010.** Comparative genomics  
692 reveals mobile pathogenicity chromosomes in *Fusarium*. *Nature* **464**: 367-373.
- 693 **Martinez D, Berka RM, Henrissat B, Saloheimo M, Arvas M, Baker SE, Chapman J,**  
694 **Chertkov O, Coutinho PM, Cullen D et al. 2008.** Genome sequencing and analysis of  
695 the biomass-degrading fungus *Trichoderma reesei* (syn. *Hypocrea jecorina*). *Nature*  
696 *Biotechnology* **26**: 553-560.
- 697 **Misof B, Meyer B, von Reumont BM, Kuck P, Misof K, Meusemann K. 2013.** Selecting  
698 informative subsets of sparse supermatrices increases the chance to find correct trees.  
699 *BMC Bioinformatics* **14**: 348.
- 700 **Nagendran S, Hallen-Adams HE, Paper JM, Aslam N, Walton JD. 2009.** Reduced  
701 genomic potential for secreted plant cell-wall-degrading enzymes in the ectomycorrhizal  
702 fungus *Amanita bisporigera*, based on the secretome of *Trichoderma reesei*. *Fungal*  
703 *Genetics and Biology* **46**: 427-435.
- 704 **Ochman H, Moran NA. 2001.** Genes lost and genes found: evolution of bacterial

- 705 pathogenesis and symbiosis. *Science* **292**: 1096-1099.
- 706 **Ott T, Fritz E, Polle A, Schützendübel A. 2002.** Characterisation of antioxidative systems  
707 in the ectomycorrhiza-building basidiomycete *Paxillus involutus* (Bartsch) Fr. and its  
708 reaction to cadmium. *FEMS microbiology ecology* **42**: 359-66.
- 709 **Parra G, Bradnam K, Korf I. 2007.** CEGMA: a pipeline to accurately annotate core genes  
710 in eukaryotic genomes. *Bioinformatics* **23**: 1061-1067.
- 711 **Peterson TN, Brunak S, von Heijne G, Nielsen H. 2011.** SignalP 4.0: discriminating signal  
712 peptides from transmembrane regions. *Nature Methods* **8**: 785-786.
- 713 **Pintard L, Willems A, Peter M. 2004.** Cullin-based ubiquitin ligases: Cul3-BTB complexes  
714 join the family. *EMBO journal* **23**: 1681-1687.
- 715 **Pitt JI. 1979.** *Geosmithia*, gen. nov. for *Penicillium lavendulum* and related species.  
716 *Canadian Journal of Botany* **57**: 2021-2030.
- 717 **Ploetz RC, Hulcr J, Wingfield MJ, De Beer ZW. 2013.** Destructive tree diseases  
718 associated with ambrosia and bark beetles: black swan events in tree pathology? *Plant*  
719 *Disease* **97**: 856-872.
- 720 **Pócsi I, Prade RA, Penninckx MJ. 2004.** Glutathione, altruistic metabolite in fungi.  
721 *Advances in microbial physiology* **49**: 1-76.
- 722 **Raffaele S, Kamoun S. 2012.** Genome evolution in filamentous plant pathogens: why  
723 bigger can be better. *Nature Reviews Microbiology* **10**: 417-430.
- 724 **Ranwez V, Harispe S, Delsuc F, Douzery EJP. 2011.** MACSE: Multiple Alignment of  
725 Coding SEquences Accounting for Frameshifts and Stop Codons. *PLoS One* **6**: e22594.
- 726 **Rawlings ND, Barrett AJ, Finn RD. 2016.** Twenty years of the MEROPS database of  
727 proteolytic enzymes, their substrates and inhibitors. *Nucleic Acids Research* **44**: D343-  
728 D350.
- 729 **Ronquist F, Teslenko M, van der Mark P, Ayres DL, Darling A, Höhna S, Larget B, Liu  
730 L, Suchard MA, Huelsenbeck JP. 2012.** MrBayes 3.2: efficient Bayesian phylogenetic  
731 inference and model choice across a large model space. *Systematic Biology* **61**: 539-  
732 542.
- 733 **Rugman-Jones PF, Seybold SJ, Graves AD, Stouthamer R. 2015.** Phylogeography of the  
734 walnut twig beetle, *Pityophthorus juglandis*, the vector of thousand cankers disease in  
735 North American walnut trees. *PLoS ONE* **10**: e118264.
- 736 **Schuelke TA, Westbrook A, Broders K, Woeste K, MacManes MD. 2016.** De novo  
737 genome assembly of *Geosmithia morbida*, the causal agent of thousand cankers  
738 disease. *PeerJ* **4**: e1952.

- 739 **Simao FA, Waterhouse RM, Ioannidis P, Kriventseva EV, Zdobnov EM. 2015.** BUSCO:  
740 assessing genome assembly and annotation completeness with single-copy orthologs.  
741 *Bioinformatics* 1–3.
- 742 **Simpson JT, Wong K, Jackman SD, Schein JE, Jones SJ, Birol I. 2009.** ABySS: A  
743 parallel assembler for short read sequence data. *Genome Research* 19: 1117-1123.
- 744 **Smit AFA, Hubley R, Green P. 1996.** RepeatMasker. [WWW document] URL  
745 <http://www.repeatmasker.org>.
- 746 **Solomon PS, Oliver RP. 2002.** Evidence that  $\gamma$ -aminobutyric acid is a major nitrogen  
747 source during *Cladosporium fulvum* infection of tomato. *Planta* 214: 414-420.
- 748 **Son H, Fu M, Lee Y, Lim JY, Min K, Kim JC, Choi GJ, Lee YW. 2016.** A novel  
749 transcription factor gene FHS1 is involved in the DNA damage response in *Fusarium*  
750 *graminearum*. *Scientific reports* 6: 21572.
- 751 **Spanu PD, Abbott JC, Amselem J, Burgis TA, Soanes DM, Stüber K, van Themaat EV,  
752 Brown JK, Butcher SA, Gurr SJ et al. 2010.** Genome expansion and gene loss in  
753 powdery mildew fungi reveal tradeoffs in extreme parasitism. *Science* 330: 1543-1546.
- 754 **Staats M, van Kan JA. 2012.** Genome update of *Botrytis cinerea* strains B05.10 and T4.  
755 *Eukaryotic Cell* 11: 1413-1414.
- 756 **Stamatakis A. 2014.** RAxML Version 8: A tool for Phylogenetic Analysis and Post-analysis  
757 of Large Phylogenies. *Bioinformatics* 30: 1312–1313.
- 758 **Stanke M, Keller O, Gunduz I, Hayes A, Waack S, Morgenstern B. 2006.** AUGUSTUS:  
759 ab initio prediction of alternative transcripts. *Nucleic acids research* 34: W435-W439.
- 760 **Stukenbrock EH, Croll D. 2014.** The evolving fungal genome. *Fungal Biology Reviews* 28:  
761 1-2.
- 762 **Suyama M, Torrents D, Bork P. 2006.** PAL2NAL: robust conversion of protein sequence  
763 alignments into the corresponding codon alignments. *Nucleic Acids Research* 34: W609-  
764 W612.
- 765 **Terfehr D, Dahlmann TA, Specht T, Zadra I, Kurnsteiner H, Kuck U. 2014.** Genome  
766 Sequence and Annotation of *Acremonium chrysogenum*, Producer of the  $\beta$ -Lactam  
767 Antibiotic Cephalosporin C. *Genome Announcements* 2: e00948-14.
- 768 **Tisserat N, Cranshaw W, Leatherman D, Utley C, Alexander K. 2009.** Black walnut  
769 mortality in colorado caused by the walnut twig beetle and thousand cankers disease.  
770 *Plant Health Progress* 1–10.

- 771 **Trail F, Xu JR, San Miguel P, Halgren RG, Kistler HC. 2003.** Analysis of expressed  
772 sequence tags from *Gibberella zeae* (anamorph *Fusarium graminearum*). *Fungal*  
773 *Genetics and Biology* **38**: 187-197.
- 774 **Utlely C, Nguyen T, Roubtsova T, Coggeshall M, Ford TM, Grauke LJ, Graves AD,**  
775 **Leslie CA, McKenna J, Woeste K et al. 2013.** Susceptibility of walnut and hickory  
776 species to *Geosmithia morbida*. *Plant Disease* **97**: 601–607.
- 777 **Veneault-Fourrey C, Barooah M, Egan M, Wakley G, Talbot NJ. 2006.** Autophagic fungal  
778 cell death is necessary for infection by the rice blast fungus. *Science* **312**: 580-583.
- 779 **Wang H, Xu Z, Gao L, Hao B. 2009.** A fungal phylogeny based on 82 complete genomes  
780 using the composition vector method. *BMC Evolutionary Biology* **9**: 195.
- 781 **Wang Y, Lim L, DiGuistini S, Robertson G, Bohlmann J, Breuil C. 2013.** A specialized  
782 ABC efflux transporter GcABC□G1 confers monoterpene resistance to *Grosmannia*  
783 *clavigera*, a bark beetle□associated fungal pathogen of pine trees. *New Phytologist*.  
784 **197**: 886-898.
- 785 **Winnenburg R, Baldwin TK, Urban M, Rawlings C, Köhler J, Hammond-Kosack KE.**  
786 **2006.** PHI-base: a new database for pathogen host interactions. *Nucleic acids research*.  
787 **34**: D459-464. [WWW document] URL <http://www.phi-base.org/>. [accessed 22  
788 November 2015].
- 789 **Yang Z. 2007.** PAML 4: phylogenetic analysis by maximum likelihood. *Molecular Biology*  
790 *Evolution* **24**: 1586-1591.
- 791 **Zerillo MM, Caballero JI, Woeste K, Graves AD, Hartel C, Pscheidt JW, Tonos J,**  
792 **Broders K, Cranshaw W, Seybold SJ et al. 2014.** Population structure of *Geosmithia*  
793 *morbida*, the causal agent of thousand cankers disease of walnut trees in the United  
794 States. *PLoS ONE* **9**: e112847.
- 795 **Zhang Y, Zhang K, Fang A, Han Y, Yang J, Xue M, Bao J, Hu D, Zhou B, Sun X et al.**  
796 **2014.** Specific adaptation of *Ustilagoidea virens* in occupying host florets revealed by  
797 comparative and functional genomics. *Nature communications* **5**: 3849
- 798 **Zhao Z, Liu H, Wang C, Xu J. 2013.** Erratum to: Comparative analysis of fungal genomes  
799 reveals different plant cell wall degrading capacity in fungi. *BMC Genomics* **15**: 6.
- 800 **Zheng P, Xia Y, Xiao G, Xiong C, Hu X, Zhang S, Zheng H, Huang Y, Zhou Y, Wang S et**  
801 **al. 2011.** Genome sequence of the insect pathogenic fungus *Cordyceps militaris*, a  
802 valued traditional Chinese medicine. *Genome Biology* **12**: R116.
- 803
- 804

805 **Figure legends**

806 **Figure 1** Carbohydrate active enzymes (CAZymes) distribution for *Geosmithia* species, other  
807 Hypocreales, and *Ceratocystis platani*. The species in red are pathogens, while the names in  
808 black are nonpathogens. CAZymes were identified with HMMer searches of dbCAN peptide  
809 models. GH: glycoside hydrolases, GT: glycosyltransferases, PL: polysaccharide lyases, CE:  
810 carbohydrate esterases, AA: auxiliary activities enzymes, and CBM: carbohydrate-binding  
811 molecules.

812 **Figure 2** Proteolytic enzymes distribution for *Geosmithia* species, other Hypocreales, and  
813 *Ceratocystis platani*. The species in red are pathogens, while the names in black are  
814 nonpathogens. Proteases were identified using BLASTp searches against the MEROPs  
815 database v10. S: serine, M: metallo, C: cysteine, A: aspartic, T:threonine, I: inhibitors, P: mixed,  
816 G: glutamic.

817 **Figure 3** The Bayesian Markov Chain Monte Carlo (BMCMC) phylogeny was estimated using  
818 the mixed amino acid model in MrBayes (Ronquist *et al.*, 2012) on a dataset containing 89,999  
819 positions. This topology is identical to partitioned analyses conducted in RAxML (Stamatakis  
820 2014). All nodes in BMCMC and ML analyses receive maximum support. The black circles  
821 symbolize classes. The color-shaded boxes at the right of the figure denote the orders within  
822 each class. The first and second numbers in parentheses represent the genome sizes in Mbp  
823 and the number of predict protein models, respectively. Black and red branches correspond to  
824 non-pathogens and pathogens, respectively, which span multiple orders.

825

826

827

828

829

830 **Support Information**

831 The following Supporting Information is available for this article:

832 **Table S1** Complete BLASTp results against the Phibase4 database for *Geosmithia*  
833 *morbida*, *Geosmithia flava* and *Geosmithia putterillii*.

834 **Table S2** CAZymes hits data for 20 fungal species used in this study.

835 **Table S3** Merops hits data for 20 fungal species used in this study

836 **Table S4** Complete BLASTp results against NCBI's nr database for 38 genes found to  
837 be under selection in *Geosmithia morbida*.

838 **Methods S1** A modified nexus file illustrating Mr. Bayes block used for constructing  
839 phylogeny.

Table 1 Species, geographic origins, and host information for *Geosmithia morbida*, *Geosmithia flava*, and *Geosmithia putterillii*.

| Species               | Pathogen | Isolate | Geographic origins | Host                       |
|-----------------------|----------|---------|--------------------|----------------------------|
| <i>G. morbida</i> *   | Yes      | 1262    | California         | <i>Juglans californica</i> |
| <i>G. flava</i>       | No       | CCF3333 | Czech Republic     | <i>Castanea sativa</i>     |
| <i>G. putterillii</i> | No       | CCF4204 | California         | <i>Juglans californica</i> |

\*This isolate is the reference genome. The details of assembly for this genome are discussed in Schuelke *et al.*, 2016.



Table 2 Statistics for sequence data from isolates of *Geosmithia morbida*, *Geosmithia flava* and *Geosmithia putterillii*.

| Species               | Total read pairs |              | Est. coverage |        |
|-----------------------|------------------|--------------|---------------|--------|
| <i>G. morbida</i>     | 14,013,863*      | 20,674,289** | 109x*         | 160x** |
| <i>G. flava</i>       | 16,183,281       |              | 102x          |        |
| <i>G. putterillii</i> | 19,711,745       |              | 131x          |        |

\*These values are for paired-end read data for *G. morbida* from Schuelke *et al.*, 2016. \*\*These values are for mate-pair read data for *G. morbida* from Schuelke *et al.*, 2016.

Table 3 Fungal species used for phylogenetic analysis in this study. The species in bold were utilized for positive selection analysis.

| Species                              | Class           | Order           | Ecological role       | Download source | References                                                                      |
|--------------------------------------|-----------------|-----------------|-----------------------|-----------------|---------------------------------------------------------------------------------|
| <b><i>Geosmithia morbida</i></b>     | Sordariomycetes | Hypocreales     | Pathogen              | -               | Schuelke <i>et al.</i> , 2016                                                   |
| <b><i>Geosmithia flava</i></b>       | Sordariomycetes | Hypocreales     | Non-pathogen          | -               | -                                                                               |
| <b><i>Geosmithia putterillii</i></b> | Sordariomycetes | Hypocreales     | Non-pathogen          | -               | -                                                                               |
| <b><i>Acremonium chrysogenum</i></b> | Sordariomycetes | Hypocreales     | Beneficial            | FungalEnsembl   | Terfehr <i>et al.</i> , 2014                                                    |
| <b><i>Stanjemonium griseum</i></b>   | Sordariomycetes | Hypocreales     | Saprotrophic          | JGI             | Used with permission                                                            |
| <i>Trichoderma virens</i>            | Sordariomycetes | Hypocreales     | Mycoparasite          | JGI             | Kubicek <i>et al.</i> , 2011                                                    |
| <b><i>Trichoderma reesei</i></b>     | Sordariomycetes | Hypocreales     | Saprotrophic          | FungalEnsembl   | Martinez <i>et al.</i> , 2008                                                   |
| <i>Escovopsis weberi</i>             | Sordariomycetes | Hypocreales     | Mycoparasite          | EnsemblGenomes  | de Man <i>et al.</i> , 2016                                                     |
| <i>Ustilagoidea virens</i>           | Sordariomycetes | Hypocreales     | Biotrophic pathogen   | FungalEnsembl   | Zhang <i>et al.</i> , 2014                                                      |
| <i>Cordyceps militaris</i>           | Sordariomycetes | Hypocreales     | Insect pathogen       | FungalEnsembl   | Zheng <i>et al.</i> , 2011                                                      |
| <b><i>Myrothecium inundatum</i></b>  | Sordariomycetes | Hypocreales     | Saprotrophic          | JGI             | Used with permission                                                            |
| <i>Fusarium solani</i>               | Sordariomycetes | Hypocreales     | Necrotrophic pathogen | FungalEnsembl   | Coleman <i>et al.</i> , 2009                                                    |
| <i>Fusarium graminearum</i>          | Sordariomycetes | Hypocreales     | Necrotrophic pathogen | FungalEnsembl   | Trail <i>et al.</i> , 2003; Cuomo <i>et al.</i> , 2007; Ma <i>et al.</i> , 2010 |
| <i>Ceratocystis platani</i>          | Sordariomycetes | Microascales    | Pathogen              | FungalEnsembl   | Belbahri 2015                                                                   |
| <b><i>Neurospora crassa</i></b>      | Sordariomycetes | Sordariales     | Saprotrophic          | FungalEnsembl   | Galagan <i>et al.</i> , 2003                                                    |
| <b><i>Chaetomium globosum</i></b>    | Sordariomycetes | Sordariales     | Saprotrophic          | JGI             | Berka <i>et al.</i> , 2011                                                      |
| <b><i>Grosmannia clavigera</i></b>   | Sordariomycetes | Ophiostomatales | Pathogen              | FungalEnsembl   | DiGuistini <i>et al.</i> , 2011                                                 |
| <i>Eutypa lata</i>                   | Sordariomycetes | Xylariales      | Pathogen              | JGI             | Blanco-Ulate <i>et al.</i> , 2013                                               |

|                                  |               |                |                       |              |                                                        |
|----------------------------------|---------------|----------------|-----------------------|--------------|--------------------------------------------------------|
| <i>Botrytis cinerea</i>          | Leotiomycetes | Helotiales     | Necrotrophic pathogen | FungalEmsebl | Amselem <i>et al.</i> , 2011,<br>Staats & van Kan 2012 |
| <b><i>Oidiodendron maius</i></b> | Leotiomycetes | Incertae sedis | Mycorrhizal           | JGI          | Kohler <i>et al.</i> , 2015                            |

Table 4 Length-based statistics for *Geosmithia morbida*, *Geosmithia flava*, and *Geosmithia putterillii* generated with QUASt v2.3. The average GC content for *G. morbida*, *G. flava*, and *G. putterillii* equals 54%, 52%, and 55.5% respectively. All genome completeness values were produced with BUSCO v1.1b1. These percentages represent genes that are complete and not duplicated or fragmented.

| Species               | Est. genome size (Mbp) | k-mer for ABySS assembly | Scaffold count | Largest scaffold | NG50*     | LG50* | Genome completeness | Predicted Proteins |
|-----------------------|------------------------|--------------------------|----------------|------------------|-----------|-------|---------------------|--------------------|
| <i>G. morbida</i>     | 26.5                   | NA <sup>1</sup>          | 73             | 2,597,956        | 1,305,468 | 7     | 98                  | 6,273              |
| <i>G. flava</i>       | 29.6                   | 91                       | 1,819          | 1,534,325        | 460,430   | 22    | 98                  | 6,976              |
| <i>G. putterillii</i> | 30.0                   | 91                       | 320            | 2,758,267        | 1,379,352 | 9     | 98                  | 7,086              |

<sup>1</sup>Genome assembly for *G. morbida* was constructed using AllPaths-LG (v49414). See Schuelke *et al.*, 2016 for further details. \*NG50 is the scaffold length such that considering scaffolds of equal or longer length produce 50% of the bases of the reference genome. LG50 is the number of scaffolds with length NG50.

|                       | <b>Genome size<br/>(Mbp)</b> | <b>GC (%)</b> | <b>Bases<br/>masked<br/>(%)</b> | <b>Retroelements<br/>(N)</b> | <b>DNA<br/>transposons<br/>(N)</b> |
|-----------------------|------------------------------|---------------|---------------------------------|------------------------------|------------------------------------|
| <i>G. morbida</i>     | 26.5                         | 54.30         | 0.81                            | 152                          | 60                                 |
| <i>G. flava</i>       | 29.6                         | 51.87         | 0.63                            | 401                          | 42                                 |
| <i>G. putterillii</i> | 30.0                         | 55.47         | 0.64                            | 214                          | 15                                 |

Table 5 Repetitive elements profile of *Geosmithia* species generated with RepeatMasker v4.0.5.

Table 6 Functional analyses of genes under positive selection in *Geosmithia morbida* detected by the branch-site model in PAML 4.8. The gene number corresponds to the sequence ID in the *G. morbida* protein file available at DRYAD.

| Gene number | Function                                                                                                              | dn/ds | Transmembrane domain (N) |
|-------------|-----------------------------------------------------------------------------------------------------------------------|-------|--------------------------|
| 3078        | Takes part in intracellular signaling, protein recruitment to various membranes                                       | 2.04  | 0                        |
| 2666        | Involved in receptor-mediated endocytosis and vesicle trafficking                                                     | 2.01  | 0                        |
| 563         | Unclear function                                                                                                      | 1.94  | 1                        |
| 2194        | Unknown function                                                                                                      | 1.94  | 0                        |
| 801         | Catalyzes the transfer of electrons from ferrocytochrome c to oxygen converting the cytochrome c into water           | 1.93  | 1                        |
| 3944        | Involved in methylation and have a wide range of substrate specificity                                                | 1.90  | 5                        |
| 5058        | Involved in ubiquitination of proteins target for degradation                                                         | 1.90  | 0                        |
| 1843        | Involved in heat-shock response                                                                                       | 1.86  | 0                        |
| 521         | Involved in damage DNA binding and repair                                                                             | 1.85  | 0                        |
| 5111        | Involved in receptor-mediated endocytosis and vesicle trafficking                                                     | 1.84  | 0                        |
| 4128        | Catalyzes the hydrolysis of esters                                                                                    | 1.84  | 0                        |
| 923         | Hydrolases the peptide bond at the C-terminus of ubiquitin                                                            | 1.83  | 1                        |
| 4405        | Involved in transport and metabolism of lipids                                                                        | 1.83  | 1                        |
| 3137        | Part of proteins with diverse functions such as cell-cycle regulators, signal transducers, transcriptional initiators | 1.78  | 0                        |
| 4359        | Unknown function                                                                                                      | 1.73  | 2                        |
| 5639        | Involved in rRNA synthesis                                                                                            | 1.67  | 0                        |
| 5           | Involved in vesicular transport                                                                                       | 1.63  | 0                        |
| 624         | Involved in transfer of glucose molecules that are part of a larger glycosylation machinery                           | 1.62  | 9                        |
| 3929        | Unknown function but associates with GRAM domain found in glucosyltransferases and other membrane affiliated proteins | 1.61  | 0                        |
| 1456        | Involved in DNA repair and replication                                                                                | 1.59  | 0                        |
| 4829        | Form cAMP                                                                                                             | 1.59  | 0                        |
| 254         | Major ATP transporters                                                                                                | 1.59  | 2                        |
| 4888        | Unknown function                                                                                                      | 1.54  | 0                        |
| 5426        | Hydrolyzes nonubiquitinated peptides                                                                                  | 1.54  | 0                        |
| 5709        | Transcription factors                                                                                                 | 1.50  | 0                        |
| 859         | May be involved in the timing of nuclear migration                                                                    | 1.50  | 0                        |

|      |                                                                                                                                                                                 |      |   |
|------|---------------------------------------------------------------------------------------------------------------------------------------------------------------------------------|------|---|
| 5703 | Cleave peptide bonds in other proteins                                                                                                                                          | 1.47 | 6 |
| 5255 | Heat shock protein involved in induced stress response to ethanol                                                                                                               | 1.46 | 3 |
| 5704 | Regulates gene expression during oxidative stress caused by the host plant                                                                                                      | 1.46 | 0 |
| 2485 | Transfer phosphates                                                                                                                                                             | 1.39 | 0 |
| 6116 | Hydratase and/or isomerase                                                                                                                                                      | 1.38 | 0 |
| 5266 | Breaks down actin, cell membrane deformations                                                                                                                                   | 1.34 | 0 |
| 5000 | Catalyzes the first step in histidine biosynthesis                                                                                                                              | 1.34 | 0 |
| 3326 | Involved in de novo synthesis of nucleotide purine                                                                                                                              | 1.32 | 0 |
| 2142 | E2 enzymes that catalyze the binding of activated ubiquitin to the substrate protein.<br>The substrate proteins are targeted for degradation by the proteasome                  | 1.24 | 0 |
| 581  | Ribosomal protein                                                                                                                                                               | 1.17 | 0 |
| 5948 | Involved in initiation of transcription                                                                                                                                         | 1.14 | 1 |
| 3700 | Part of the TOM complex that recognizes and regulates the transport of<br>mitochondrial precursor molecules from the cytosol to the intracellular space of the<br>mitochondrion | 1.03 | 0 |

dn/ds is the ratio of nonsynonymous substitutions to synonymous changes.





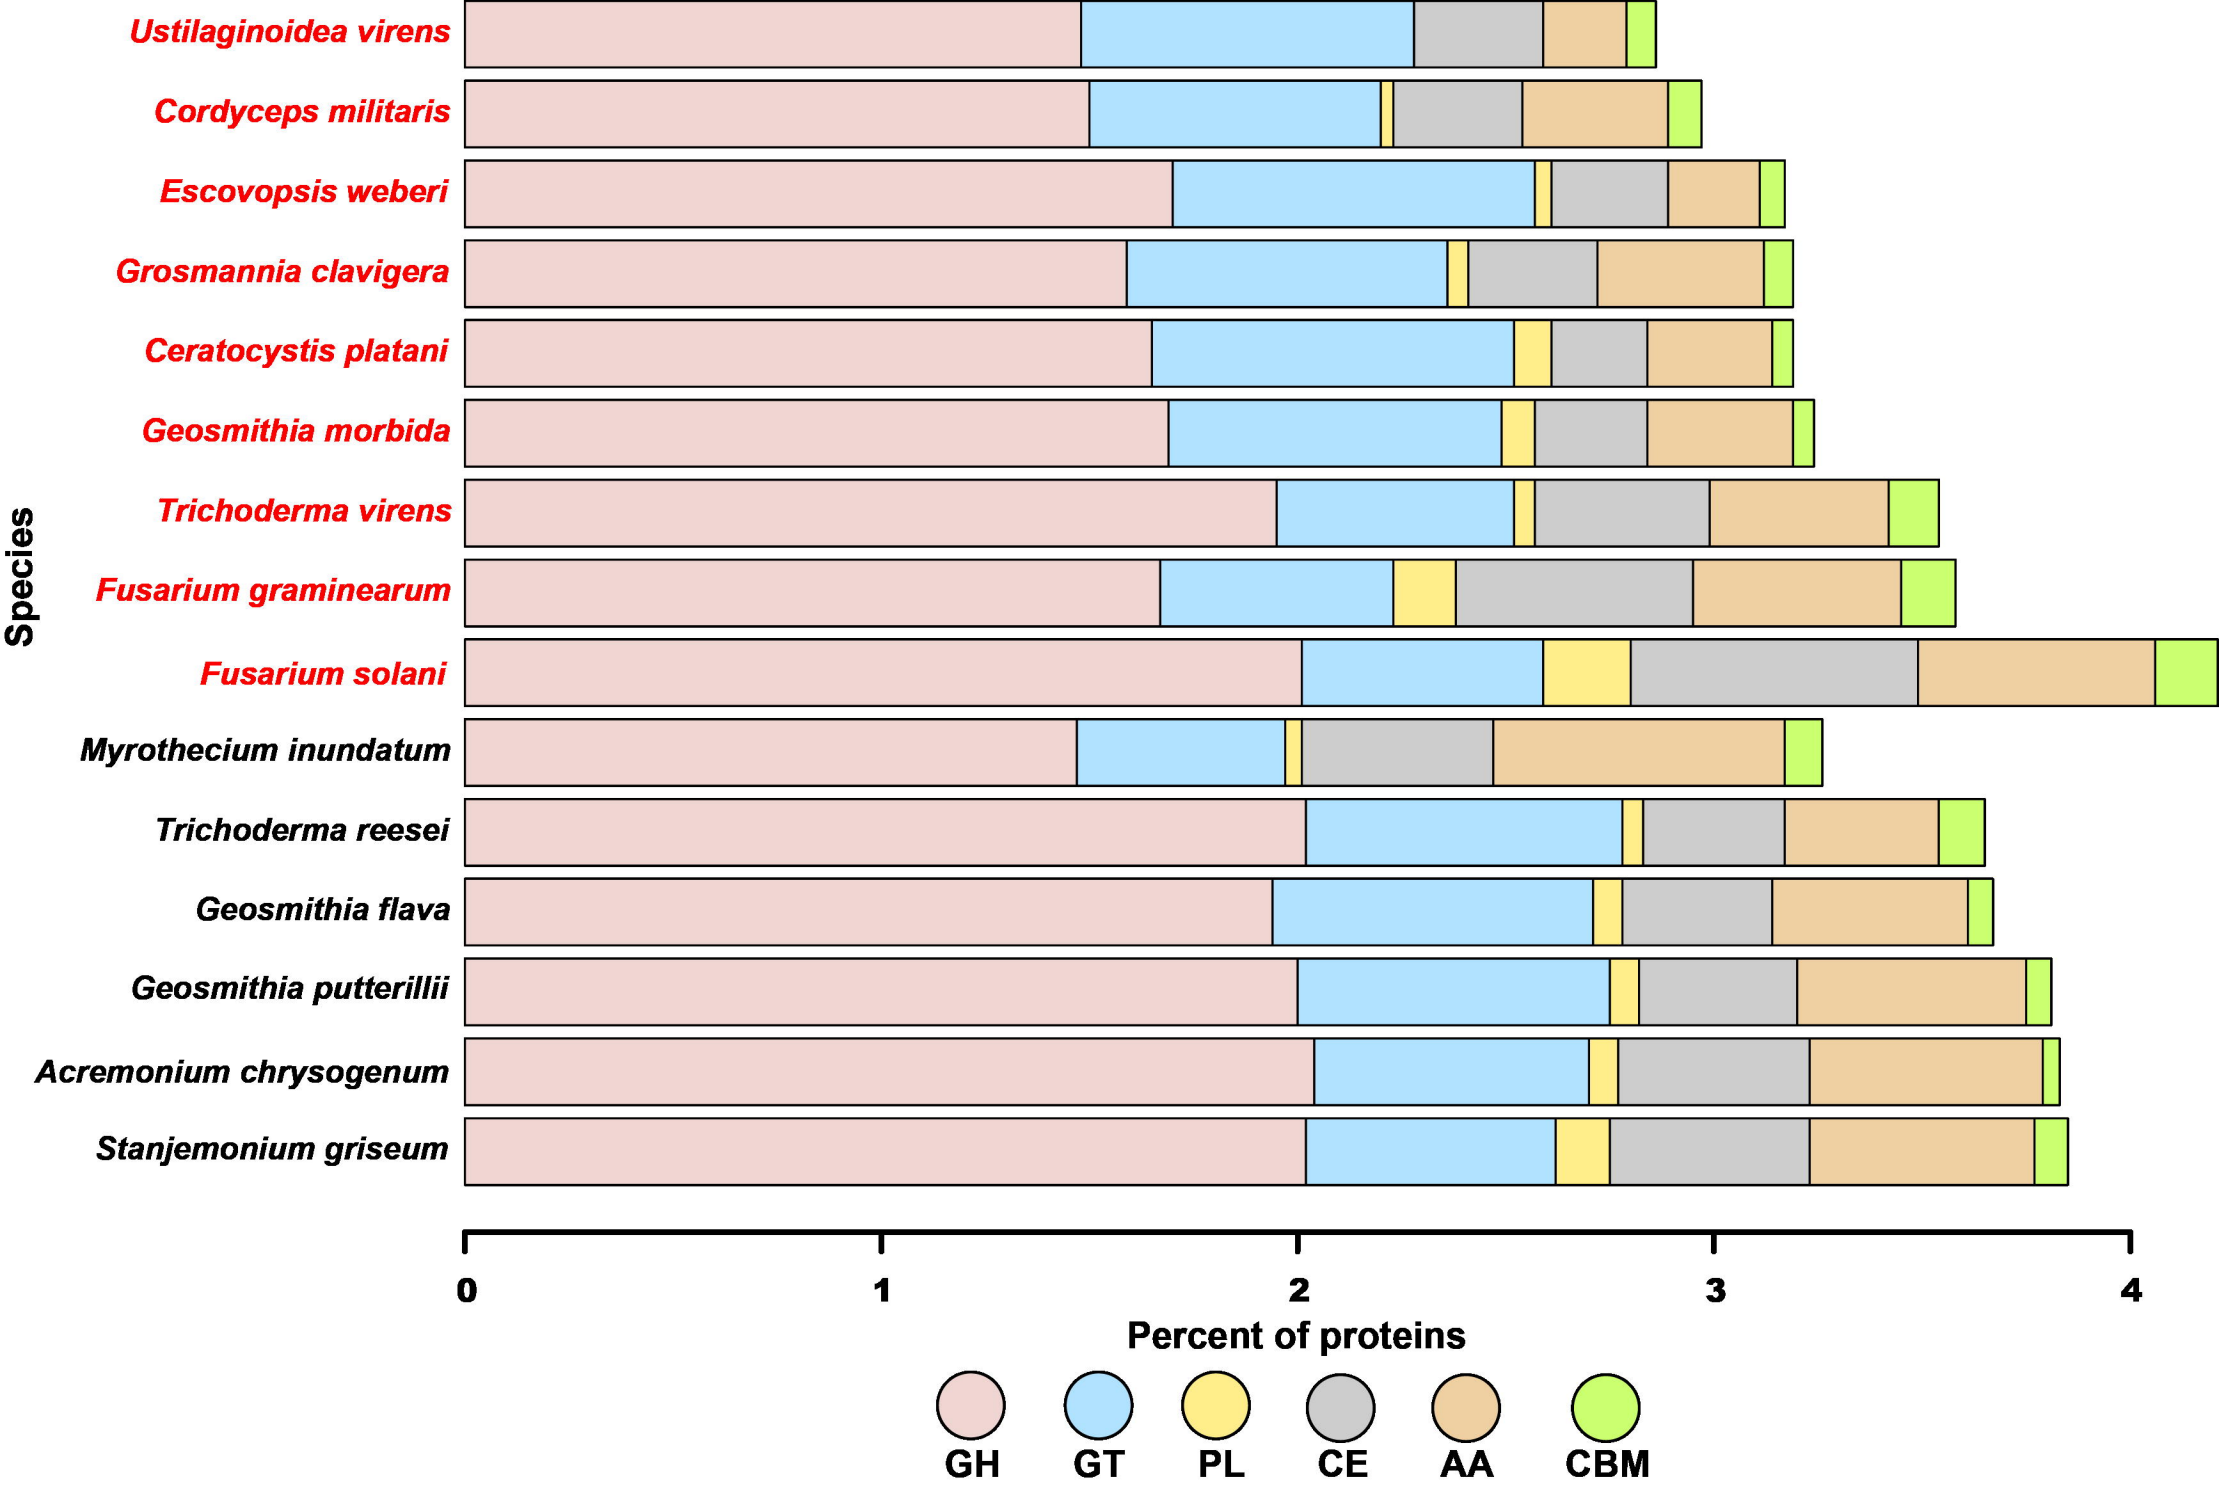

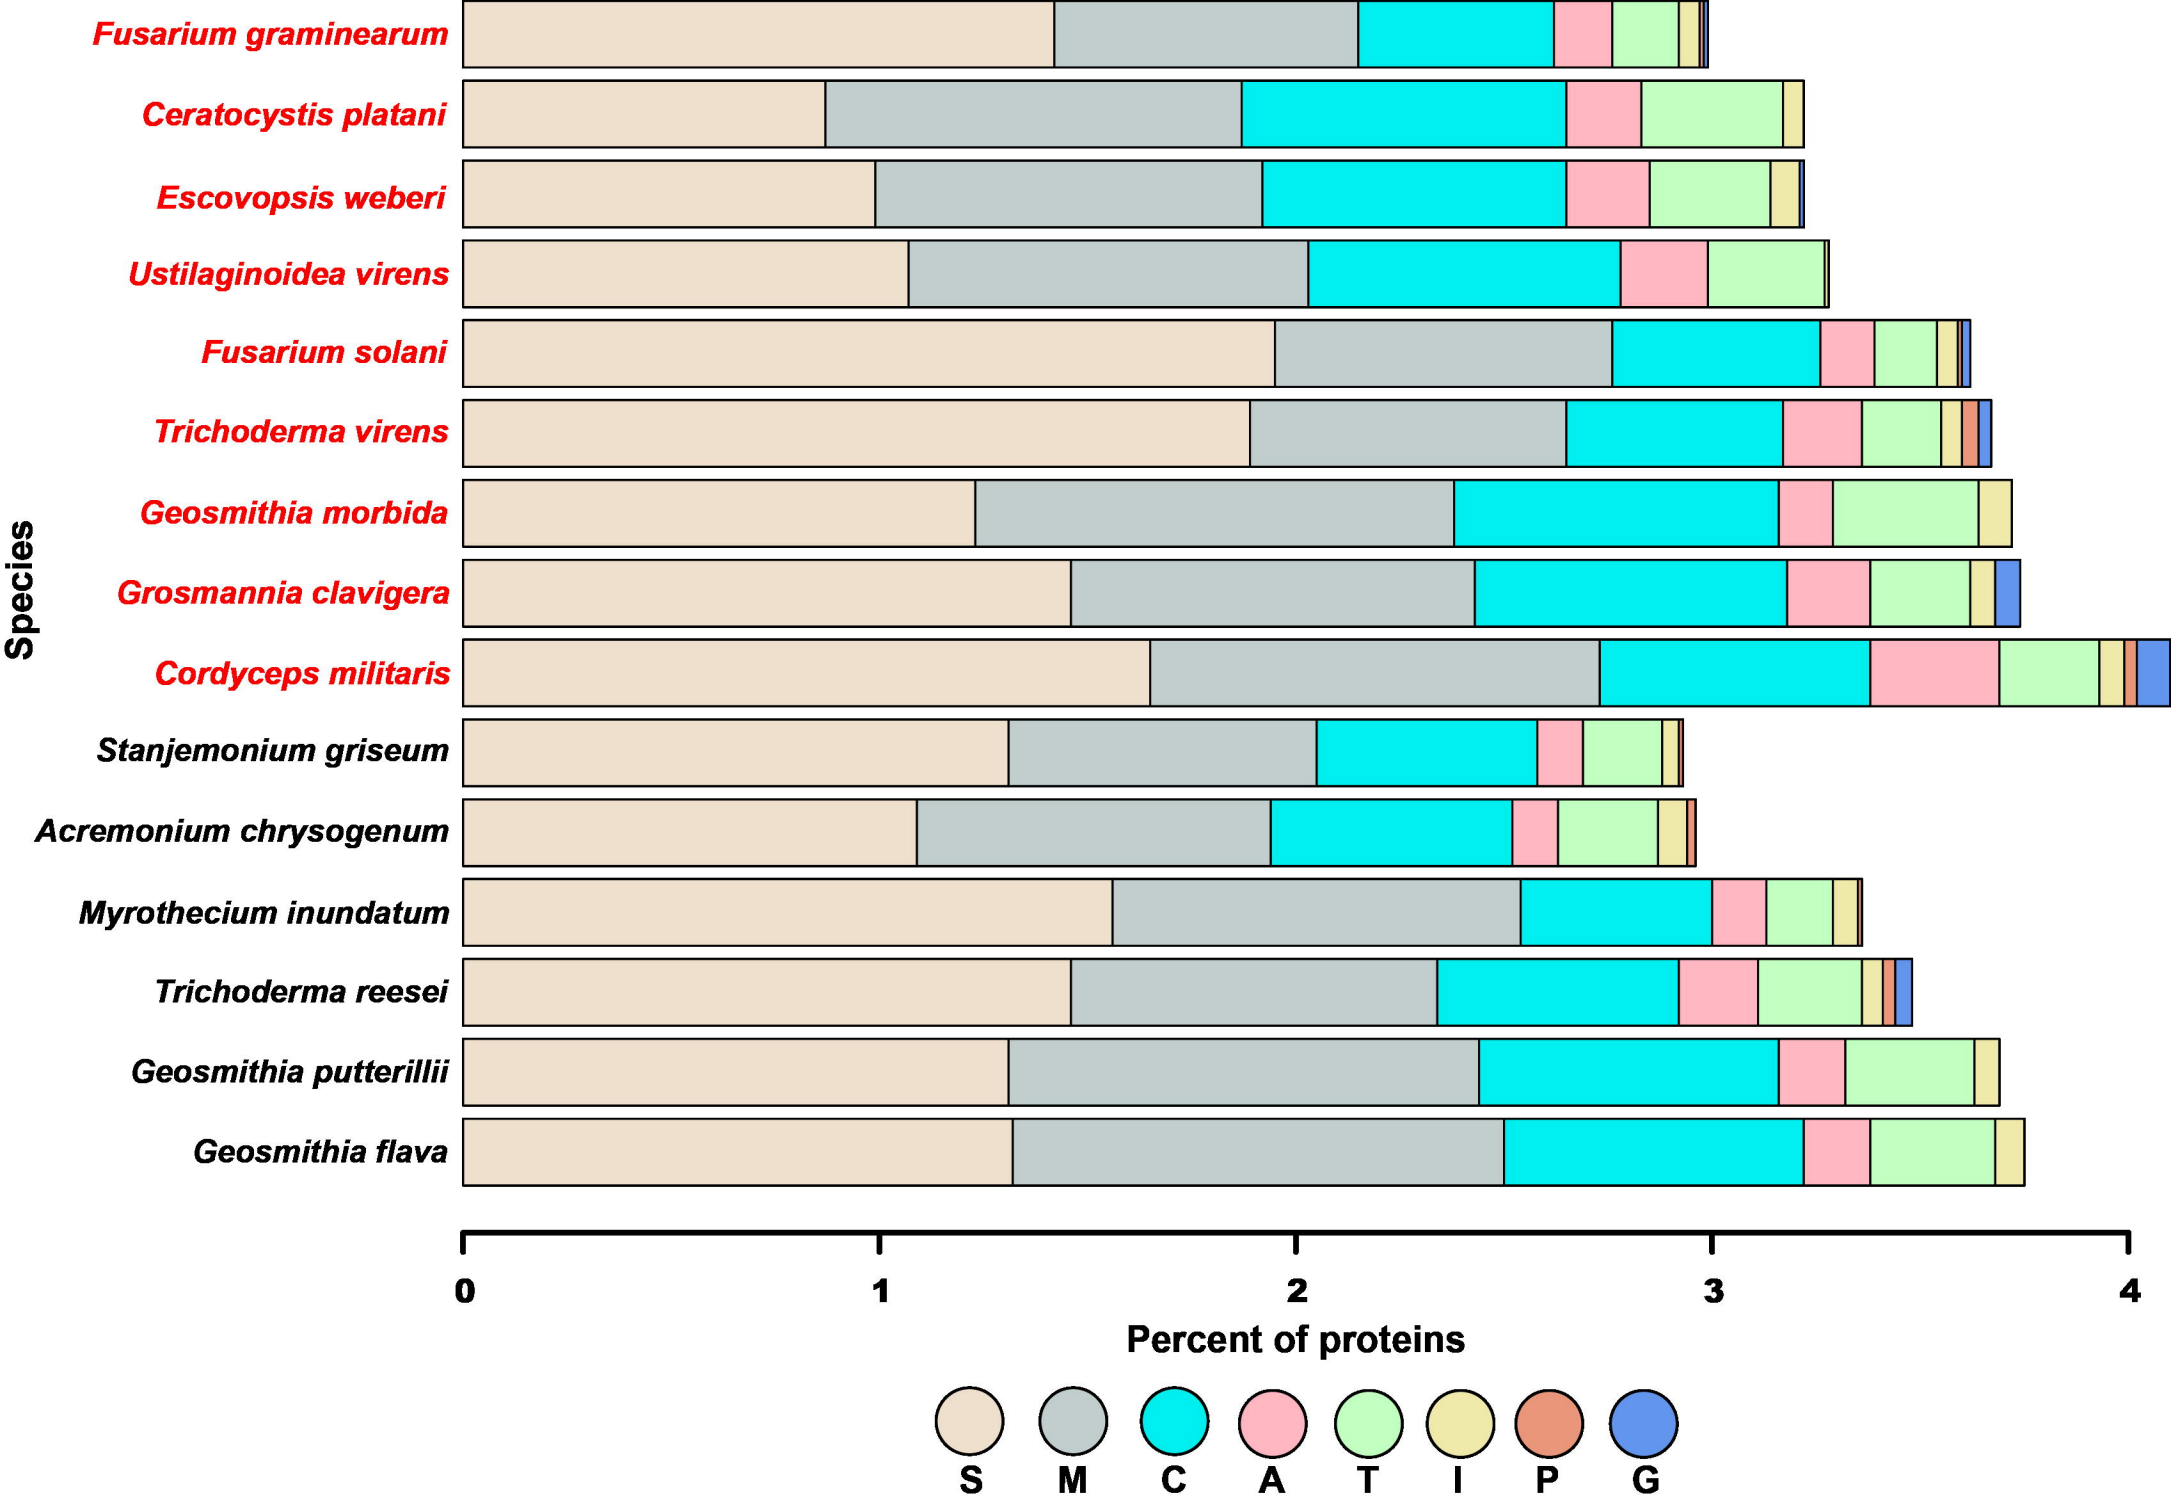

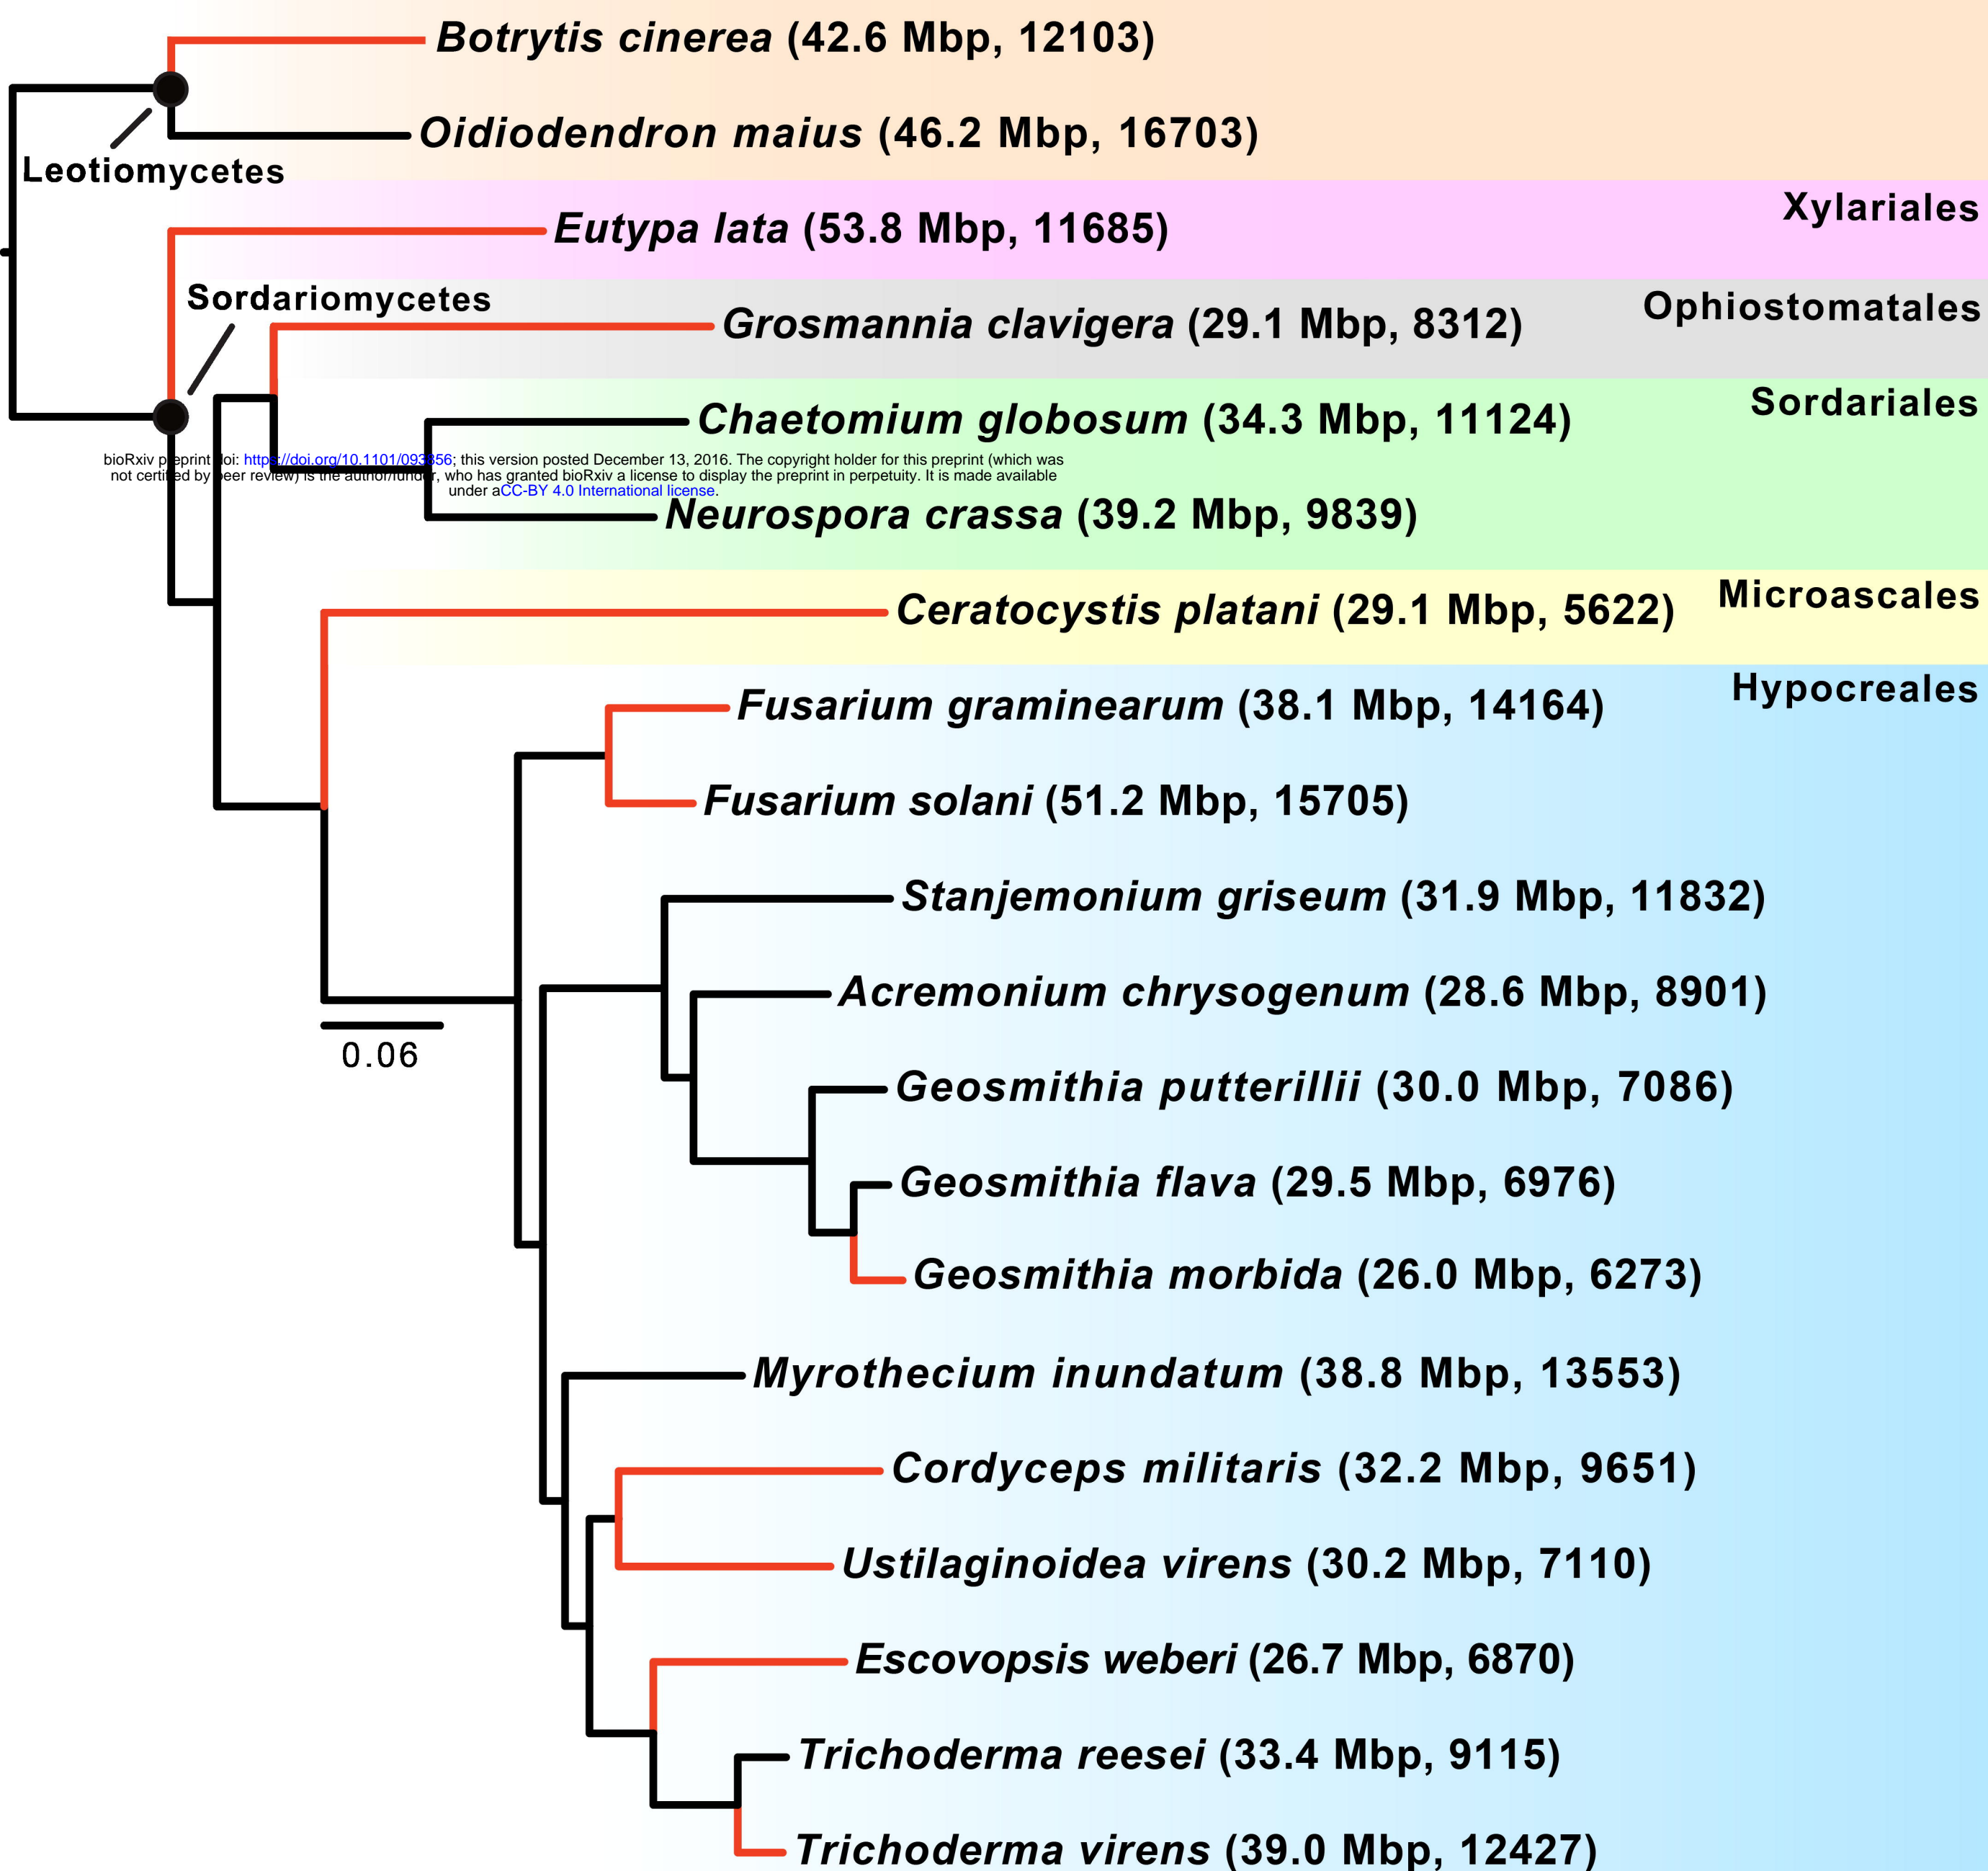

Source: http://www.biorxiv.org/content/10.1101/093856v1.full.pdf
